# Supplementary material for: Silica sulfuric acid: a reusable solid catalyst for one pot synthesis of densely substituted pyrrole-fused isocoumarins under solvent-free conditions
Source: publisher site journal article supplement (doi:10.3762/bjoc.9.269), 2013-11-04

## Supporting Information

for

### **Silica sulfuric acid: a reusable solid catalyst for one pot synthesis of densely substituted pyrrole-fused isocoumarins under solvent-free conditions**

Sudipta Pathak, Kamalesh Debnath and Animesh Pramanik\*

Address: Department of Chemistry, University of Calcutta, 92, A. P. C. Road, Kolkata-700 009, India; Fax: +91-33-2351-9755; Tel: +91-33-2484-1647.

Email: Animesh Pramanik\* - animesh\_in2001@yahoo.co.in

\* Corresponding author

### **Detailed analytical data**

| <b>Contents</b>                                                                   | <b>Page</b> |
|-----------------------------------------------------------------------------------|-------------|
| 1. Preparation of silica sulfuric acid (SSA).....                                 | S2          |
| 2. TGA analysis of SSA.....                                                       | S2-S3       |
| 3. IR spectrum analysis.....                                                      | S4-S5       |
| 4. NMR, IR, elemental analysis data.....                                          | S5-S10      |
| 5. <sup>1</sup> H NMR and <sup>13</sup> C NMR spectra of compounds <b>8</b> ..... | S11-S25     |

### **Preparation of silica sulfuric acid:**

15.0 g of silica gel (60–120 mesh) was washed with 1 mol/L HCl, followed by deionized water, 30% H<sub>2</sub>O<sub>2</sub>, and then again with deionized water. After thorough washing, the silica was dried overnight at 373 K in vacuum to get preconditioned silica gel. A 100-mL round-bottomed flask was charged with silica gel and fitted with a magnetic stirrer. Then chlorosulfonic acid (5.83 g, 50.0 mmol) was added dropwise to the silica gel at r.t. for a period of 0.5 h. Immediately HCl gas started to emerge from the reaction vessel. After addition of chlorosulfonic acid, the resulting mixture was stirred until there was no more HCl outgassing from the vessel. A white solid (silica sulfuric acid) of 19.0 g was obtained [1].

### **Thermal gravimetric analysis (TGA) of silica sulfuric acid (SSA):**

The weight change of catalyst precursor was measured by using a TGA thermal analyzer apparatus under a flow of dry air. The temperature was raised from room temperature to 700 °C by using a linear programmer at a heating rate of 10 °C/min. The sample weight was 18.7 mg. The TGA curve for the catalyst is illustrated in Figure S1. The weight losses found from TGA measurements agree fairly well with those expected for the decomposition of silica sulfuric acid to silica. For the catalyst, the thermo gravimetric curve seems to indicate a decomposition that is considered to be due to the removal of silica sulfuric acid (130–360 °C). It goes along with a total overall weight loss 29.29%, which solely represents the decomposition of the silica sulfuric acid to silica.<sup>2</sup>

### **References**

1. Zolfigol, M. A. *Tetrahedron* **2001**, *57*, 9509.
2. Shaterian, H. R.; Ghashang, M.; Feyzi, M. *Applied Catalysis A: General* **2008**, *345*, 128.

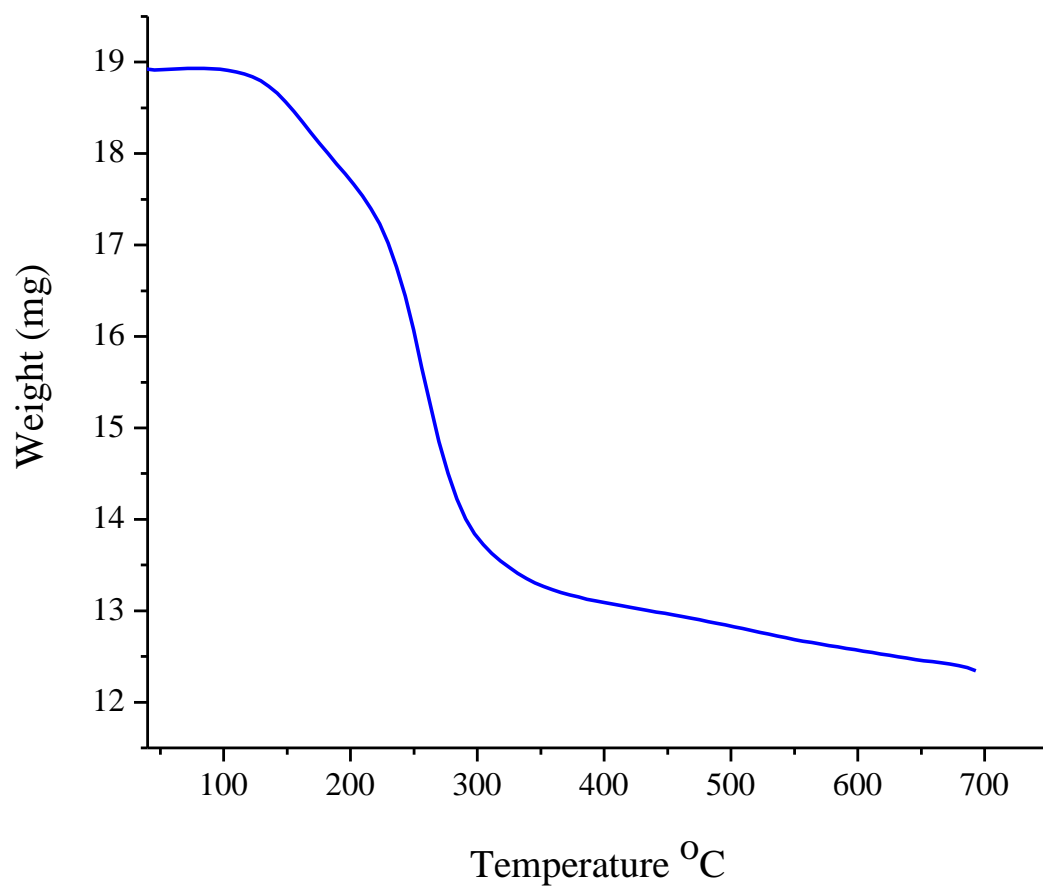

**Figure S1** TGA curve of the silica sulfuric acid.

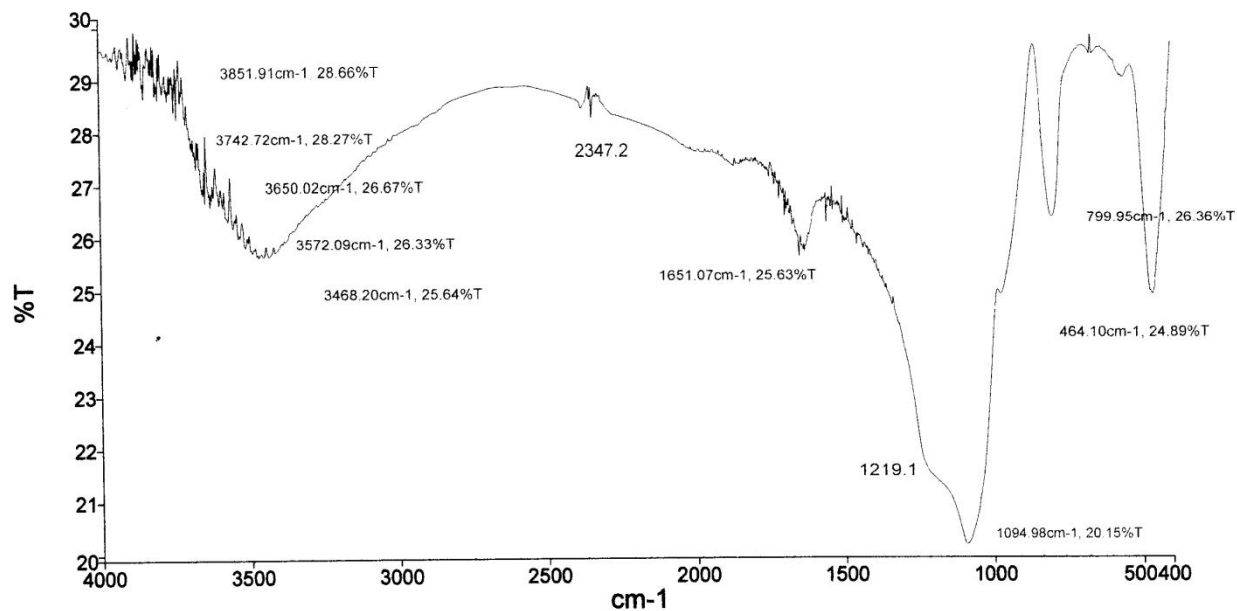

**Figure S2:** IR spectrum of Silica.

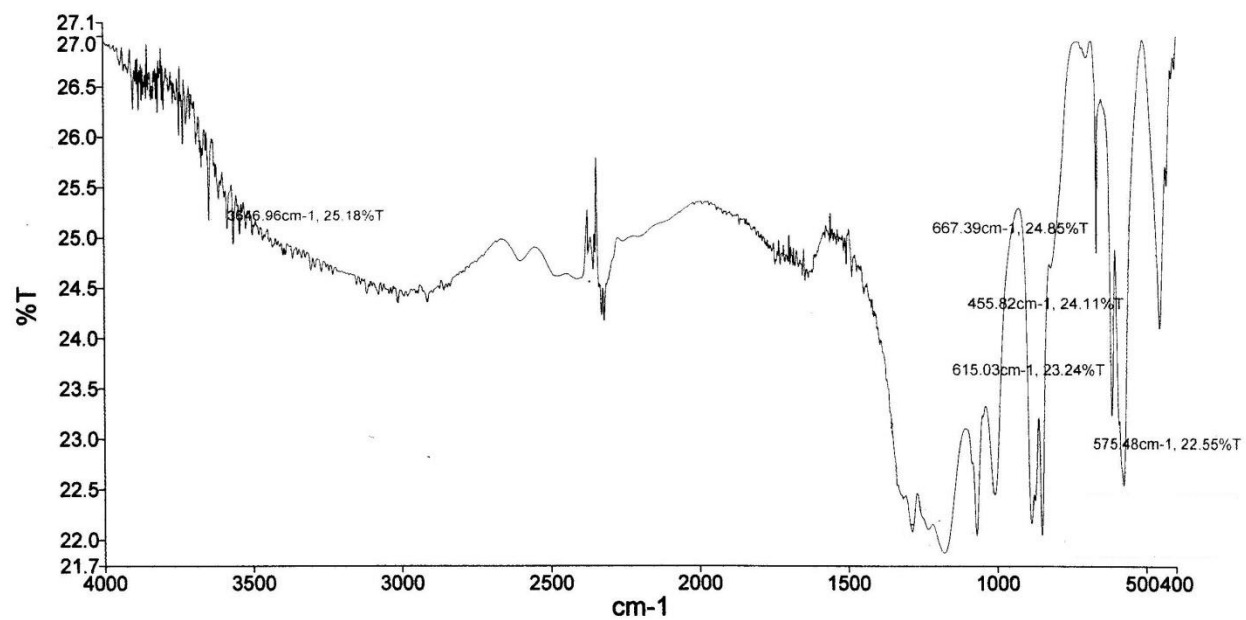

**Figure S3:** IR spectrum of silica sulfuric acid.

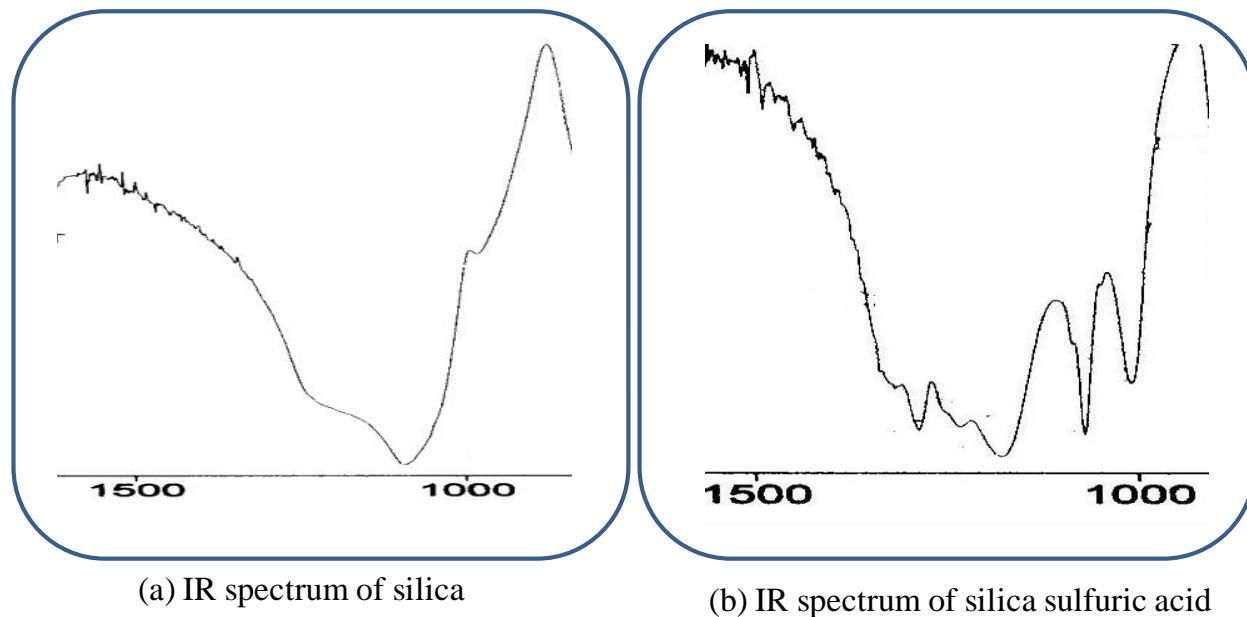

**Figure S4:** Comparison of IR spectrums of silica gel and silica sulfuric acid

**Analysis of IR spectrum:** The FT-IR spectrums of the catalyst were shown in Figure S2, S3 and S4. The catalyst is solid and solid state IR spectrum was recorded using the KBr disk technique. For silica ( $\text{SiO}_2$ ), the major peaks are broad band Si–O–Si stretching from 1100 to 1000  $\text{cm}^{-1}$ . For sulfonic acid functional group, the FT-IR absorption range of the O=S=O peaks lies in 1180–1250  $\text{cm}^{-1}$ .

### Spectral data of the compounds

**2-Methyl-5-oxo-1-phenyl-1,5-dihydro-4-oxa-1-azacyclopenta[*a*]naphthalene-3-carboxylic acidethylester (8a).** Yellow solid; mp 208-210 °C;  $^1\text{H}$  NMR ( $\text{CDCl}_3$ , 300MHz)  $\delta$  8.29 (d,  $J = 7.8$  Hz, 1H), 7.65-7.62 (m, 3H), 7.42-7.39 (m, 1H), 7.32-7.30 (m, 1H), 7.27-7.20 (m, 2H), 6.36 (d,  $J = 7.8$  Hz, 1H), 4.39 (q,  $J = 6.9$  Hz, 2H), 2.38 (s, 3H), 1.43 (t,  $J = 7.2$  Hz, 3H);  $^{13}\text{C}$  NMR ( $\text{CDCl}_3$ , 75 MHz)  $\delta$  163.6, 162.1, 139.7, 137.3, 134.2, 131.7, 130.3, 130.2, 130.2, 130.0, 128.5, 125.4,

118.4, 118.0, 112.9, 102.1, 60.1, 14.5, 12.0; IR( KBr): 1722  $\text{cm}^{-1}$ ; Anal calcd for  $\text{C}_{21}\text{H}_{17}\text{NO}_4$ : C, 72.61; H, 4.93; N, 4.03 % Found C, 72.50; H, 4.87; N, 3.98%.

**1-(4-Fluorophenyl)-2-methyl-5-oxo-1,5-dihydro-4-oxa-1-azacyclopenta[*a*]naphthalene-3-carboxylic acid ethylester (8b).** Yellow solid; mp 252-254  $^{\circ}\text{C}$ ;  $^1\text{H}$  NMR ( $\text{CDCl}_3$ , 300MHz)  $\delta$  8.23 (d,  $J = 7.8$  Hz, 1H), 7.50-7.46 (m, 2H), 7.37-7.31 (m, 3H), 7.21 (t,  $J = 8.1$  Hz, 1H), 6.38 (d,  $J = 8.1$  Hz, 1H), 4.32 (q,  $J = 6.9$  Hz, 2H), 2.36 (s, 3H), 1.41 (t,  $J = 7.2$  Hz, 3H);  $^{13}\text{C}$  NMR ( $\text{CDCl}_3$ , 75 MHz, F coupled  $^{13}\text{C}$  spectra)  $\delta$  164.8, 163.3, 161.9, 161.5, 140.7, 139.8, 134.3, 133.2, 131.7, 130.6, 130.5, 130.1, 125.5, 118.2, 118.2, 117.5, 117.1, 112.9, 102.2, 60.1, 14.4, 11.9; IR( KBr): 1725  $\text{cm}^{-1}$ ; Anal calcd for  $\text{C}_{21}\text{H}_{16}\text{FNO}_4$ : C, 69.04; H, 4.41; N, 3.83 % Found 68.96; H, 4.36; N, 3.80 %.

**1-(2-Chlorophenyl)-2-methyl-5-oxo-1,5-dihydro-4-oxa-1-azacyclopenta[*a*]naphthalene-3-carboxylic acid ethylester (8c).** Yellow solid; mp 233-235  $^{\circ}\text{C}$ ;  $^1\text{H}$  NMR ( $\text{CDCl}_3$ , 300MHz)  $\delta$  8.32 (d,  $J = 7.8$  Hz, 1H), 7.69-7.55 (m, 4H), 7.35-7.26 (m, 2H), 6.31 (d,  $J = 7.8$  Hz, 1H), 4.42 (q,  $J = 7.2$  Hz, 2H), 2.37 (s, 3H), 1.45 (t,  $J = 7.2$  Hz, 3H);  $^{13}\text{C}$  NMR ( $\text{CDCl}_3$ , 75 MHz)  $\delta$  163.5, 162.0, 140.9, 139.5, 135.1, 134.6, 133.9, 131.8, 131.0, 130.7, 130.6, 130.2, 128.5, 125.6, 118.1, 117.5, 112.4, 102.7, 60.2, 14.5, 11.6; IR( KBr): 1724  $\text{cm}^{-1}$ ; Anal calcd for  $\text{C}_{21}\text{H}_{16}\text{ClNO}_4$ : C, 66.06; H, 4.22; N, 3.67 % Found C, 66.17; H, 4.15; N, 3.61 %.

**1-(3-Chlorophenyl)-2-methyl-5-oxo-1,5-dihydro-4-oxa-1-azacyclopenta[*a*]naphthalene-3-carboxylic acid ethylester (8d).** Yellow solid; mp 230-232  $^{\circ}\text{C}$ ;  $^1\text{H}$  NMR ( $\text{CDCl}_3$ , 300MHz)  $\delta$  8.20 (d,  $J = 7.8$  Hz, 1H), 7.59-7.49 (m, 2H), 7.39 (d,  $J = 7.8$  Hz, 1H), 7.32-7.25 (m, 2H), 7.20-7.15 (m, 1H), 6.33 (d,  $J = 8.1$  Hz, 1H), 4.28 (q,  $J = 6.9$  Hz, 2H), 2.31 (s, 3H), 1.34 (t,  $J = 6.9$  Hz, 3H);  $^{13}\text{C}$  NMR ( $\text{CDCl}_3$ , 75 MHz)  $\delta$  163.3, 161.8, 140.9, 139.6, 138.4, 135.9, 134.4, 131.8, 131.2,

130.4, 130.0, 128.9, 127.0, 125.7, 118.2, 118.1, 112.8, 102.5, 60.1, 14.4, 12.0; IR( KBr): 1721  $\text{cm}^{-1}$ ; Anal calcd for  $\text{C}_{21}\text{H}_{16}\text{ClNO}_4$ : C, 66.06; H, 4.22; N, 3.67 % Found C, 66.16; H, 4.18; N, 3.63 %.

**1-(4-Chlorophenyl)-2-methyl-5-oxo-1,5-dihydro-4-oxa-1-azacyclopenta[*a*]naphthalene-3-carboxylic acid ethylester (8e).** Yellow solid; mp 218-220 °C;  $^1\text{H}$  NMR ( $\text{CDCl}_3$ , 300MHz)  $\delta$  8.23 (d,  $J = 7.8$  Hz, 1H), 7.63 (d,  $J = 6.9$  Hz, 2H), 7.43 (d,  $J = 8.4$  Hz, 2H), 7.32 (t,  $J = 7.2$  Hz, 1H), 7.24 (t,  $J = 7.2$  Hz, 1H), 6.42 (d,  $J = 8.1$  Hz, 1H), 4.32 (q,  $J = 6.9$  Hz, 2H), 2.36 (s, 3H), 1.40 (t,  $J = 7.2$  Hz, 3H);  $^{13}\text{C}$  NMR ( $\text{CDCl}_3$ , 75 MHz)  $\delta$  163.2, 161.8, 140.8, 139.6, 136.1, 135.8, 134.3, 131.7, 131.7, 130.5, 130.0, 125.5, 118.2, 117.9, 112.7, 102.3, 60.1, 14.4, 11.9; IR( KBr): 1719  $\text{cm}^{-1}$ ; Anal calcd for  $\text{C}_{21}\text{H}_{16}\text{ClNO}_4$ : C, 66.06; H, 4.22; N, 3.67 % Found C, 65.93; H, 4.15; N, 3.60 %.

**1-(4-Methoxyphenyl)-2-methyl-5-oxo-1,5-dihydro-4-oxa-1-azacyclopenta[*a*]naphthalene-3-carboxylic acid ethylester (8f).** Yellow solid; mp 194-196 °C;  $^1\text{H}$  NMR ( $\text{CDCl}_3$ , 300MHz)  $\delta$  8.23 (d,  $J = 8.1$  Hz, 1H), 7.28-7.14 (m, 4H), 7.03 (d,  $J = 8.7$  Hz, 2H), 6.39 (d,  $J = 8.1$  Hz, 1H), 4.32 (q,  $J = 6.9$  Hz, 2H), 3.87 (s, 3H), 2.30 (s, 3H), 1.35 (t,  $J = 7.2$  Hz, 3H);  $^{13}\text{C}$  NMR ( $\text{CDCl}_3$ , 75 MHz)  $\delta$  163.7, 161.9, 160.5, 140.7, 140.1, 134.3, 131.7, 130.5, 129.7, 129.5, 125.4, 118.4, 118.0, 115.3, 113.0, 101.9, 60.1, 55.6, 14.5, 11.9; IR( KBr): 1716  $\text{cm}^{-1}$ ; Anal calcd for  $\text{C}_{22}\text{H}_{19}\text{NO}_5$ : C, 70.02; H, 5.07; N, 3.71 % Found C, 70.14; H, 5.00; N, 3.66 %.

**1-(3-Methoxyphenyl)-2-methyl-5-oxo-1,5-dihydro-4-oxa-1-azacyclopenta[*a*]naphthalene-3-carboxylic acid ethylester (8g).** Yellow solid; mp 198-200 °C;  $^1\text{H}$  NMR ( $\text{CDCl}_3$ , 300MHz)  $\delta$  8.26 (d,  $J = 7.8$  Hz, 1H), 7.52 (t,  $J = 8.1$  Hz, 1H), 7.33 (t,  $J = 7.8$  Hz, 1H), 7.27-7.15 (m, 2H), 6.99-6.95 (m, 2H), 6.46 (d,  $J = 8.1$  Hz, 1H), 4.36 (q,  $J = 6.9$  Hz, 2H), 3.88 (s, 3H), 2.39 (s, 3H),

1.41 (t,  $J = 6.9$  Hz, 3H);  $^{13}\text{C}$  NMR ( $\text{CDCl}_3$ , 75 MHz)  $\delta$  163.5, 162.1, 160.9, 140.7, 139.6, 138.2, 134.3, 131.6, 130.9, 130.3, 125.4, 120.5, 118.5, 117.9, 115.9, 114.0, 112.8, 102.0, 60.1, 55.6, 14.5, 11.9; IR (KBr):  $1720\text{ cm}^{-1}$ ; Anal calcd for  $\text{C}_{22}\text{H}_{19}\text{NO}_5$ : C, 70.02; H, 5.07; N, 3.71 % Found C, 70.15; H, 5.02; N, 3.67 %.

**1-(3-Hydroxyphenyl)-2-methyl-5-oxo-1,5-dihydro-4-oxa-1-azacyclopenta[*a*]naphthalene-3-carboxylic acid ethylester (8h).** Yellow solid; mp 254-256 °C;  $^1\text{H}$  NMR ( $d_6$ -DMSO, 300MHz)  $\delta$  10.13 (bs, 1H), 8.13 (d,  $J = 7.8$  Hz, 1H), 7.53-7.43 (m, 2H), 7.32 (t,  $J = 7.5$  Hz, 1H), 7.08 (d,  $J = 8.1$  Hz, 1H), 6.95 (d,  $J = 7.5$  Hz, 1H), 6.87 (s, 1H), 6.44 (d,  $J = 8.1$  Hz, 1H), 4.24 (q,  $J = 6.9$  Hz, 2H), 2.29 (s, 3H), 1.29 (t,  $J = 6.6$  Hz, 3H);  $^{13}\text{C}$  NMR ( $d_6$ -DMSO, 75 MHz)  $\delta$  162.8, 161.5, 159.1, 140.8, 139.5, 137.8, 135.2, 131.5, 131.4, 130.2, 126.2, 119.1, 118.7, 117.7, 117.5, 115.5, 112.5, 101.2, 59.8, 14.7, 12.1; IR (KBr): 3350,  $1722\text{ cm}^{-1}$ ; Anal calcd for  $\text{C}_{21}\text{H}_{17}\text{NO}_5$ : C, 69.41; H, 4.72; N, 3.85 % Found C, 69.29; H, 4.67; N, 3.79 %.

**2-Methyl-5-oxo-1-*p*-tolyl-1,5-dihydro-4-oxa-1-azacyclopenta[*a*]naphthalene-3-carboxylic acid ethylester (8i).** Yellow solid; mp 202-204 °C;  $^1\text{H}$  NMR ( $\text{CDCl}_3$ , 300MHz)  $\delta$  8.23 (d,  $J = 8.1$  Hz, 1H), 7.38 (d,  $J = 8.1$  Hz, 2H), 7.30-7.15 (m, 4H), 6.39 (d,  $J = 8.1$  Hz, 1H), 4.33 (q,  $J = 7.2$  Hz, 2H), 2.49 (s, 3H), 2.33 (s, 3H), 1.38 (t,  $J = 7.2$  Hz, 3H);  $^{13}\text{C}$  NMR ( $\text{CDCl}_3$ , 75 MHz)  $\delta$  163.6, 162.1, 140.7, 140.2, 139.8, 134.6, 134.2, 131.6, 130.8, 130.4, 128.2, 125.3, 118.5, 118.0, 112.8, 101.9, 60.0, 21.3, 14.5, 11.9; IR (KBr):  $1720\text{ cm}^{-1}$ ; Anal calcd for  $\text{C}_{22}\text{H}_{19}\text{NO}_4$ : C, 73.12; H, 5.30; N, 3.88 % Found C, 73.01; H, 5.26; N, 3.82 %.

**1-(2,4-Dimethylphenyl)-2-methyl-5-oxo-1,5-dihydro-4-oxa-1-azacyclopenta[*a*]naphthalene-3-carboxylic acid ethylester (8j).** Yellow solid; mp 190-192 °C;  $^1\text{H}$  NMR ( $\text{CDCl}_3$ , 300MHz)  $\delta$  8.27 (d,  $J = 7.8$  Hz, 1H), 7.29-7.11 (m, 5H), 6.31 (d,  $J = 7.8$  Hz, 1H), 4.35 (q,  $J = 6.9$ , 2H), 2.44



(s, 3H), 2.29 (s, 3H), 1.86 (s, 3H), 1.38 (t,  $J = 7.2$  Hz, 3H);  $^{13}\text{C}$  NMR ( $\text{CDCl}_3$ , 75 MHz)  $\delta$  163.7, 162.2, 140.7, 140.5, 139.2, 136.4, 134.6, 133.5, 132.3, 131.7, 130.5, 128.4, 128.2, 125.5, 117.9, 117.7, 112.2, 102.2, 60.1, 21.3, 17.0, 14.5, 11.6; IR (KBr):  $1717\text{ cm}^{-1}$ ; Anal calcd for  $\text{C}_{23}\text{H}_{21}\text{NO}_4$ : C, 73.58; H, 5.64; N, 3.73 % Found C, 73.71; H, 5.56; N, 3.69 %.

**1-(4-Bromophenyl)-2-methyl-5-oxo-1,5-dihydro-4-oxa-1-azacyclopenta[*a*]naphthalene-3-carboxylic acid ethylester (8k).** Yellow solid; mp 212-214 °C;  $^1\text{H}$  NMR ( $\text{CDCl}_3$ , 300MHz)  $\delta$  8.27 (d,  $J = 7.5$  Hz, 1H), 7.80 (d,  $J = 8.4$  Hz, 2H), 7.38-7.22 (m, 4H), 6.43 (d,  $J = 8.1$  Hz, 1H), 4.36 (q,  $J = 6.9$  Hz, 2H), 2.36 (s, 3H), 1.41 (t,  $J = 7.2$  Hz, 3H);  $^{13}\text{C}$  NMR ( $\text{CDCl}_3$ , 75 MHz)  $\delta$  163.3, 161.8, 140.9, 139.6, 136.3, 134.3, 133.5, 131.8, 130.2, 130.0, 125.6, 124.2, 118.2, 118.0, 112.7, 102.5, 60.1, 14.4, 12.0; IR (KBr):  $1721\text{ cm}^{-1}$ ; Anal calcd for  $\text{C}_{21}\text{H}_{16}\text{BrNO}_4$ : C, 59.17; H, 3.78; N, 3.29 % Found 59.05; H, 3.70; N, 3.22 %.

**2-Methyl-1-(4-nitrophenyl)-5-oxo-1,5-dihydro-4-oxa-1-azacyclopenta[*a*]naphthalene-3-carboxylic acid ethylester (8l).** Yellow solid; mp 260-262 °C;  $^1\text{H}$  NMR ( $\text{CDCl}_3$ , 300MHz)  $\delta$  8.52 (d,  $J = 8.1$  Hz, 2H), 8.34 (d,  $J = 7.8$ , 1H), 7.64 (d,  $J = 8.7$  Hz, 2H), 7.39-7.30 (m, 2H), 6.36 (d,  $J = 7.5$  Hz, 1H), 4.41 (q,  $J = 7.2$  Hz, 2H), 2.41 (s, 3H), 1.44 (t,  $J = 7.2$  Hz, 3H); IR (KBr):  $1726\text{ cm}^{-1}$ ; Anal calcd for  $\text{C}_{21}\text{H}_{16}\text{N}_2\text{O}_6$ : C, 64.28; H, 4.11; N, 7.14 % Found C, 64.19; H, 4.05; N, 7.08 %.

**1-Benzyl-2-methyl-5-oxo-1,5-dihydro-4-oxa-1-azacyclopenta[*a*]naphthalene-3-carboxylic acid ethylester (8m).** Yellow solid; mp 180-182 °C;  $^1\text{H}$  NMR ( $\text{CDCl}_3$ , 300MHz)  $\delta$  8.27 (d,  $J = 7.8$  Hz, 1H), 7.44 (t,  $J = 8.4$  Hz, 1H), 7.38-7.21 (m, 5H), 7.02 (d,  $J = 6.9$  Hz, 2H), 5.54 (s, 2H), 4.38 (q,  $J = 7.2$  Hz, 2H), 2.61 (s, 3H), 1.44 (t,  $J = 6.9$  Hz, 3H);  $^{13}\text{C}$  NMR ( $\text{CDCl}_3$ , 75 MHz)  $\delta$  163.5, 161.9, 140.9, 139.2, 135.3, 134.7, 131.8, 130.1, 129.3, 128.0, 125.4, 125.3, 118.6, 118.0,

111.9, 101.8, 60.1, 48.7, 14.5, 10.9; IR( KBr): 1720  $\text{cm}^{-1}$ ; Anal calcd for  $\text{C}_{22}\text{H}_{19}\text{NO}_4$ : C, 73.12; H, 5.30; N, 3.88 % Found C, 73.21; H, 5.25; N, 3.84 %.

**2-Methyl-5-oxo-1-propyl-1,5-dihydro-4-oxa-1-azacyclopenta[*a*]naphthalene-3-carboxylic acidethylester (8n).** Yellow solid; mp 132-134  $^{\circ}\text{C}$ ;  $^1\text{H}$  NMR ( $\text{CDCl}_3$ , 300MHz)  $\delta$  8.28 (d,  $J = 7.8$  Hz, 1H), 7.64 (t,  $J = 7.8$  Hz, 1H), 7.54 (d,  $J = 8.1$  Hz, 1H), 7.29 (t,  $J = 7.2$  Hz, 1H), 4.35 (q,  $J = 6.9$  Hz, 2H), 4.17 (t,  $J = 7.2$  Hz, 2H), 2.61 (s, 3H), 1.86-1.79 (m, 2H), 1.42 (t,  $J = 6.9$  Hz, 3H), 1.03 (t,  $J = 7.2$  Hz, 3H);  $^{13}\text{C}$  NMR ( $\text{CDCl}_3$ , 75 MHz)  $\delta$  163.5, 161.9, 140.9, 138.5, 134.8, 131.9, 130.3, 125.1, 118.3, 117.8, 110.9, 101.0, 59.8, 46.7, 23.3, 14.5, 11.0, 10.9; IR( KBr): 1720  $\text{cm}^{-1}$ ; Anal calcd for  $\text{C}_{18}\text{H}_{19}\text{NO}_4$ : C, 68.99; H, 6.11; N, 4.47 % Found C, 68.88; H, 6.04; N, 4.41 %.

**1-Butyl-2-methyl-5-oxo-1,5-dihydro-4-oxa-1-azacyclopenta[*a*]naphthalene-3-carboxylic acidethylester (8o).** Yellow solid; mp 125-127  $^{\circ}\text{C}$ ;  $^1\text{H}$  NMR ( $\text{CDCl}_3$ , 300MHz)  $\delta$  8.29 (d,  $J = 7.8$  Hz, 1H), 7.65 (t,  $J = 7.5$  Hz, 1H), 7.56 (d,  $J = 8.1$  Hz, 1H), 7.30 (t,  $J = 7.8$  Hz, 1H), 4.36 (q,  $J = 7.2$  Hz, 2H), 4.20 (t,  $J = 7.8$  Hz, 2H), 2.62 (s, 3H), 1.79-1.74 (m, 2H), 1.49-1.40 (m, 5H), 1.00 (t,  $J = 7.2$  Hz, 3H);  $^{13}\text{C}$  NMR ( $\text{CDCl}_3$ , 75 MHz)  $\delta$  163.5, 161.9, 141.0, 138.4, 134.7, 132.0, 130.4, 125.1, 118.3, 117.8, 110.9, 101.0, 59.8, 45.1, 32.1, 19.8, 14.5, 13.6, 11.0; IR( KBr): 1719  $\text{cm}^{-1}$ ; Anal calcd for  $\text{C}_{19}\text{H}_{21}\text{NO}_4$ : C, 69.71; H, 6.47; N, 4.28 % Found C, 69.61; H, 6.41; N, 4.20 %.

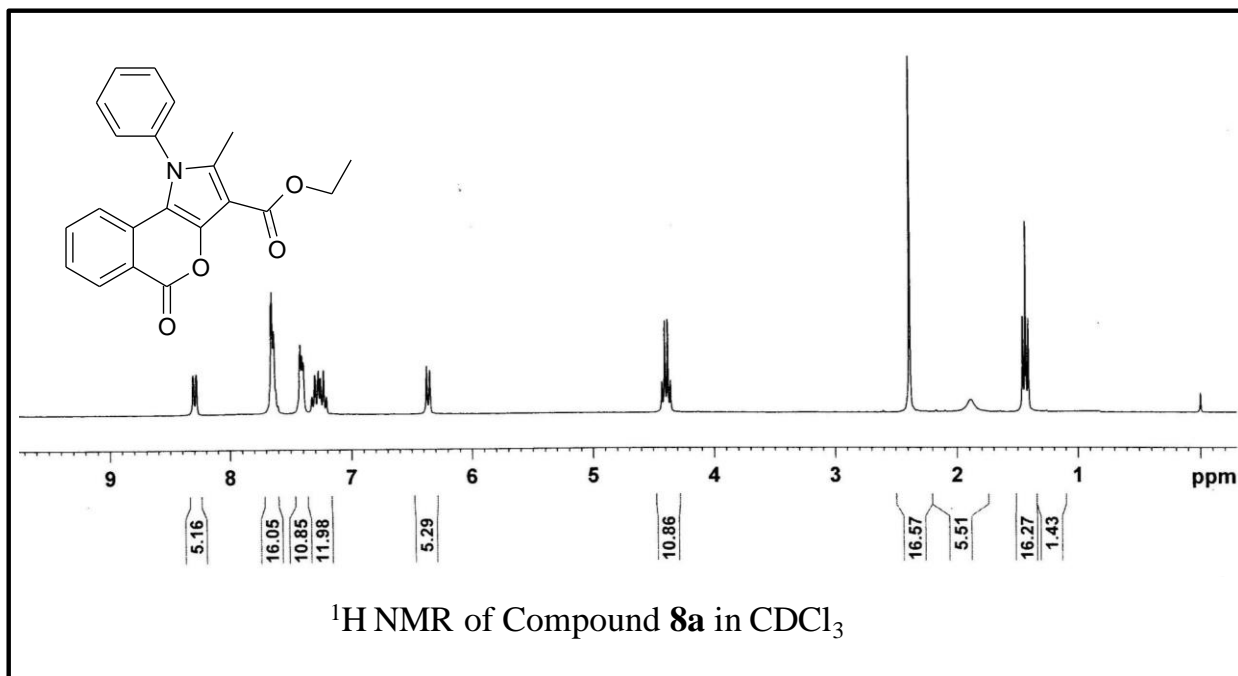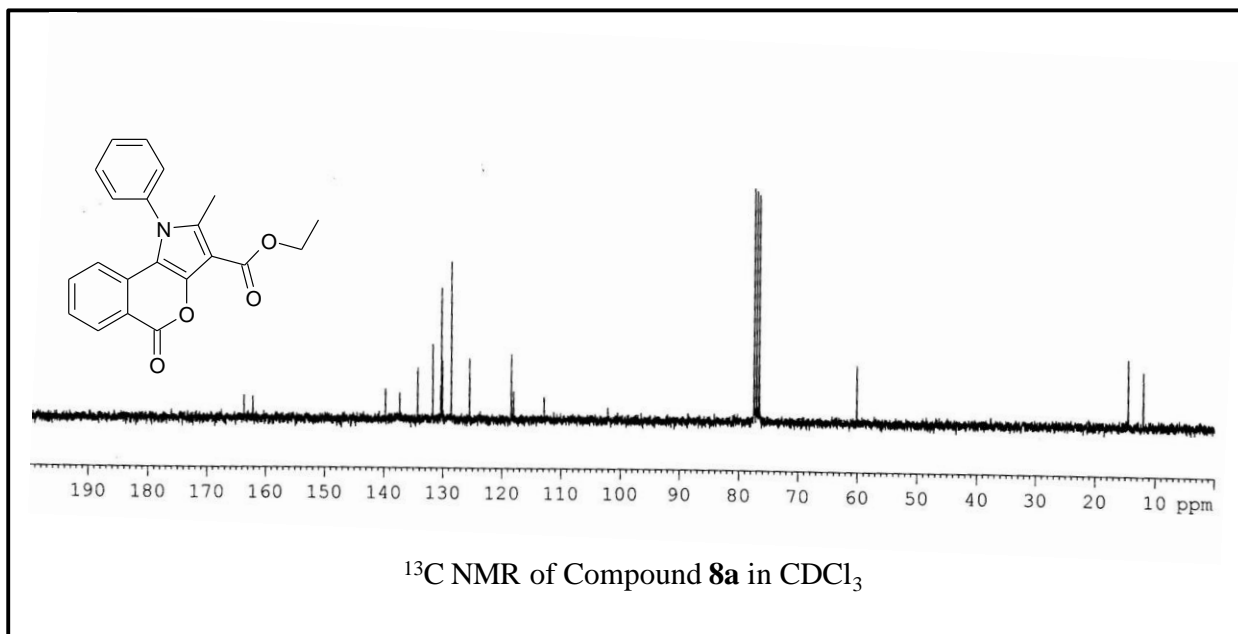

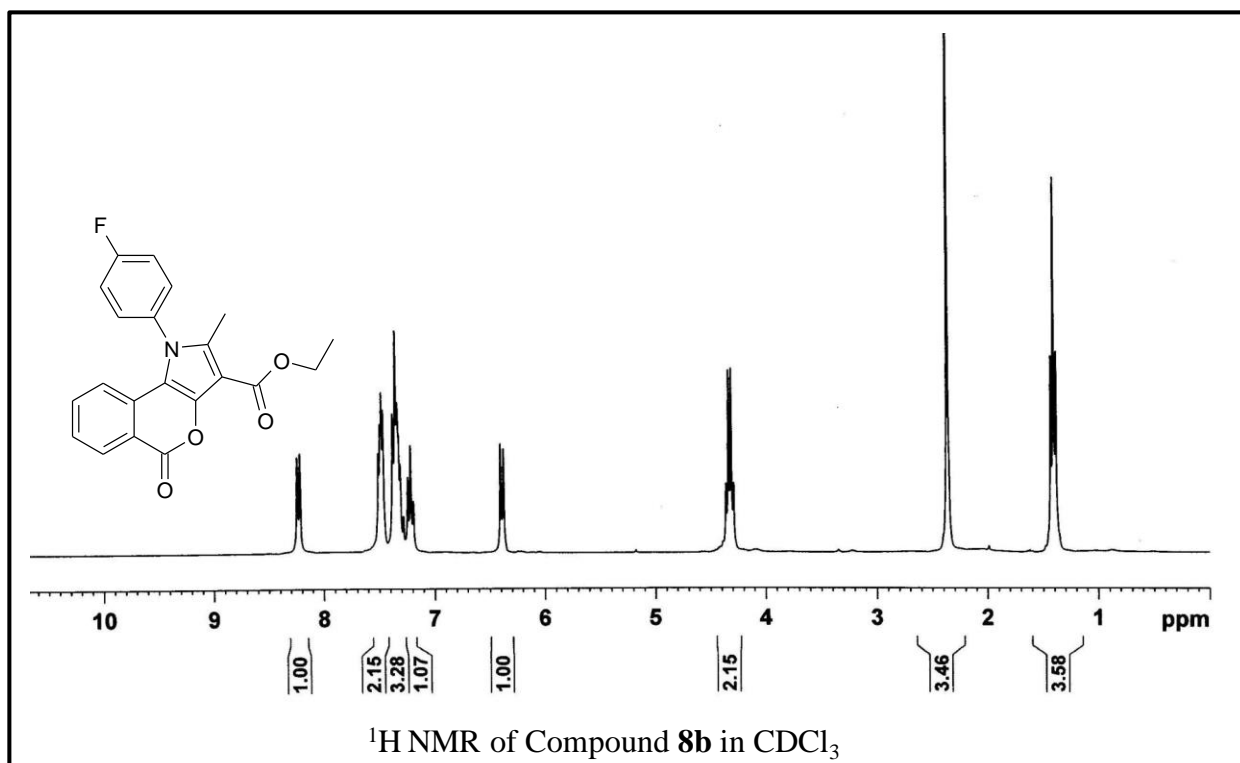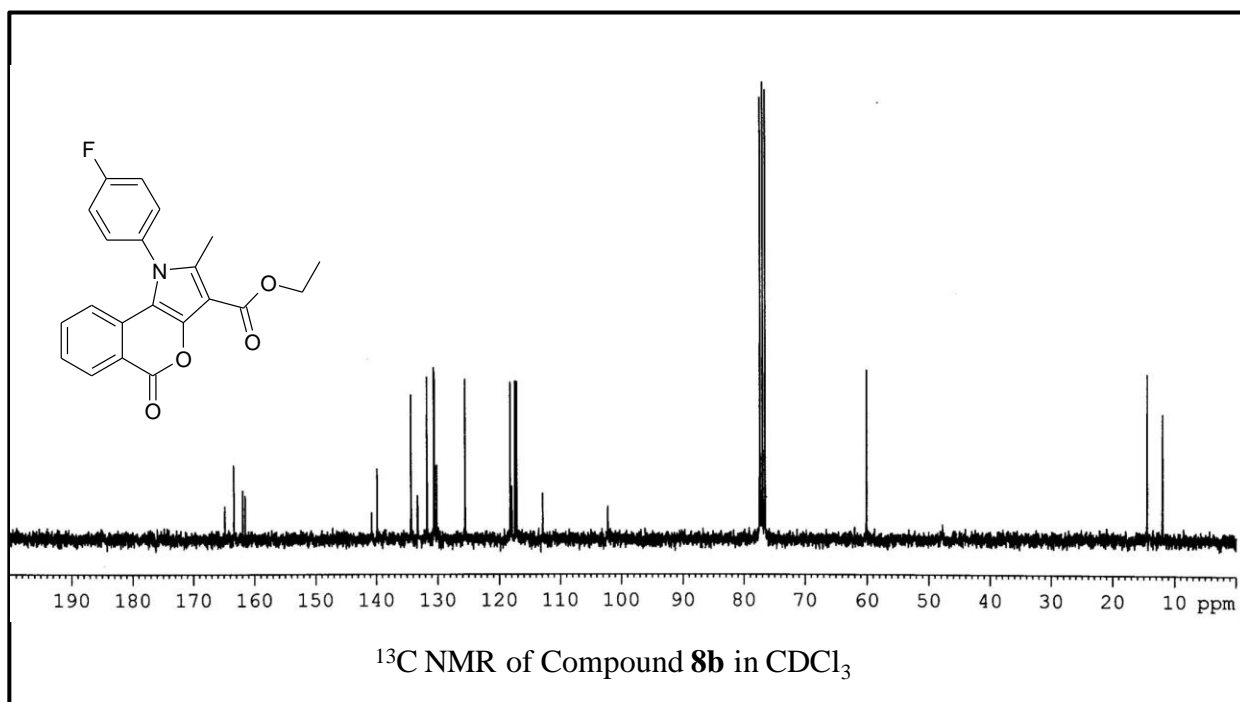

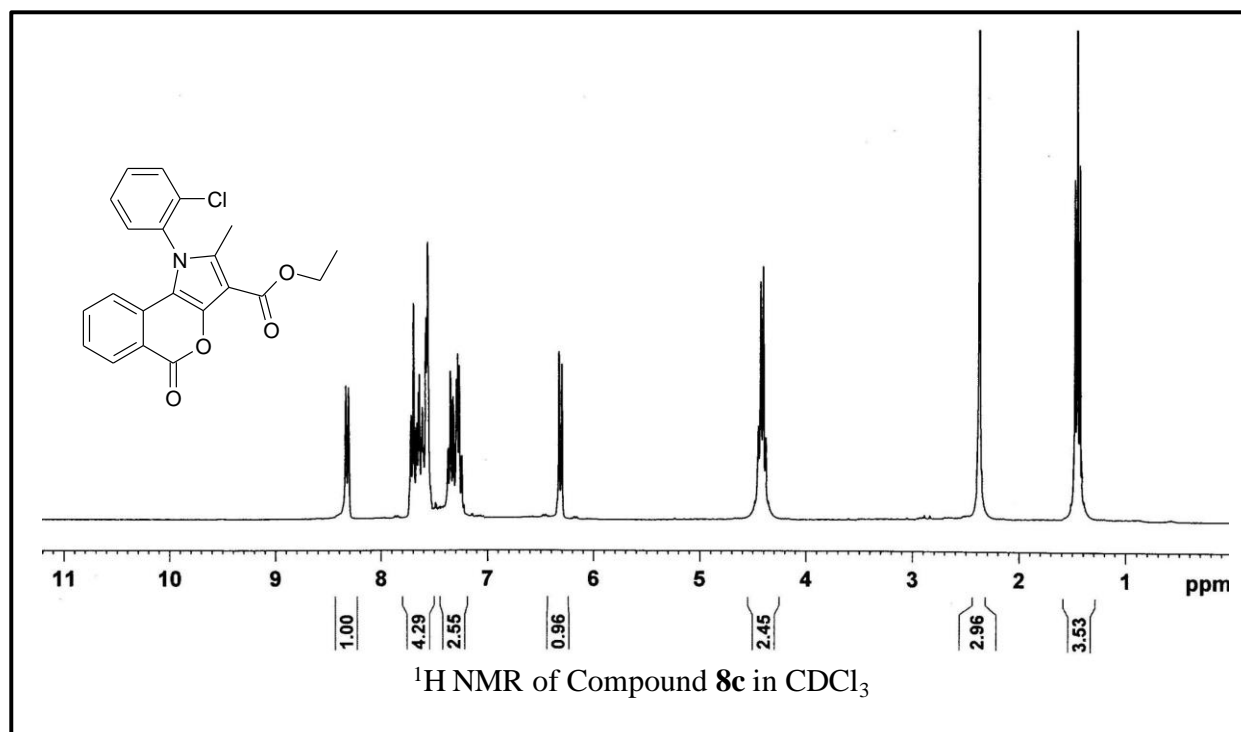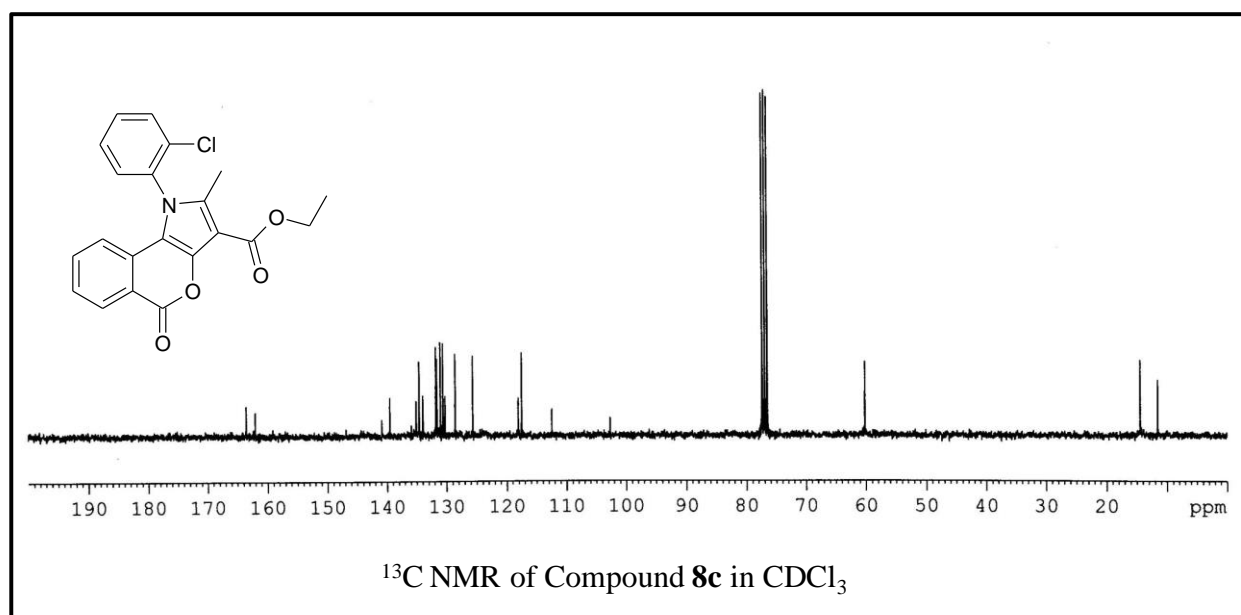

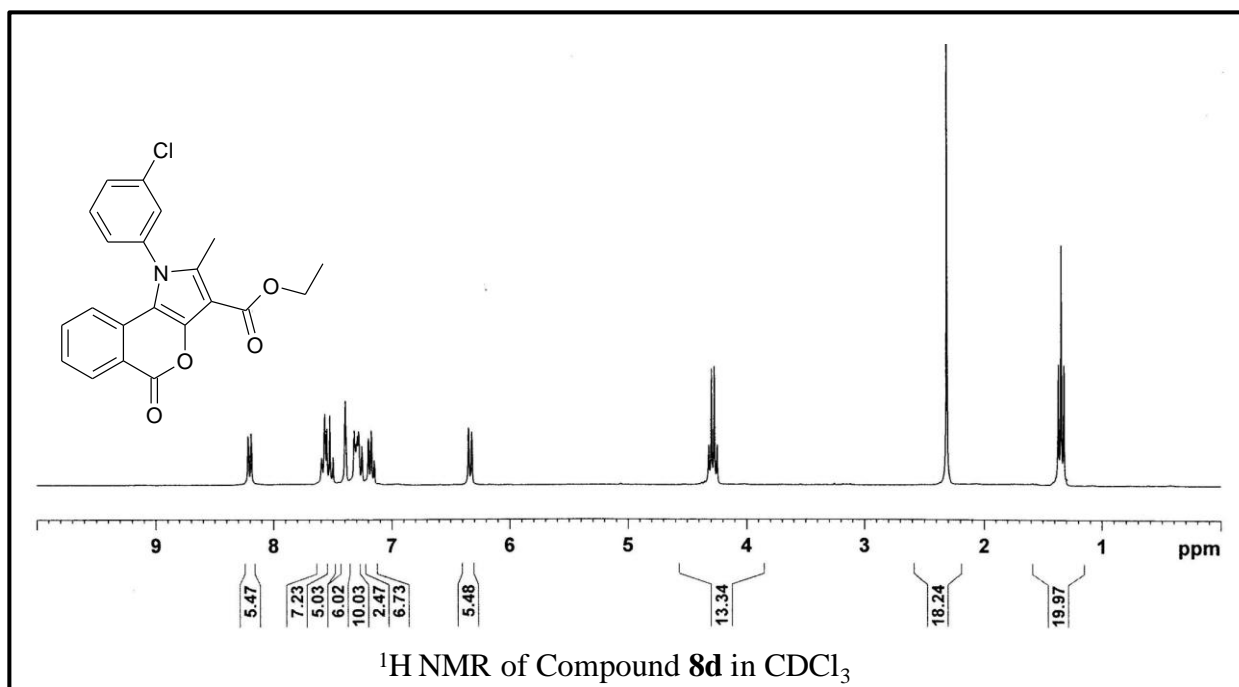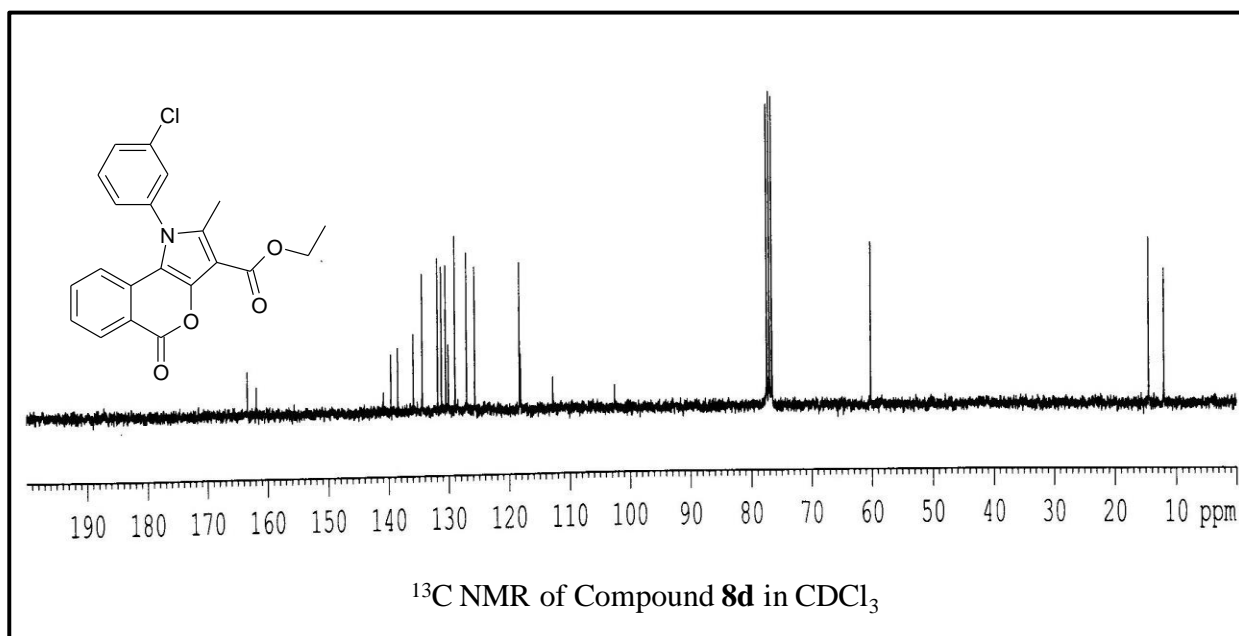

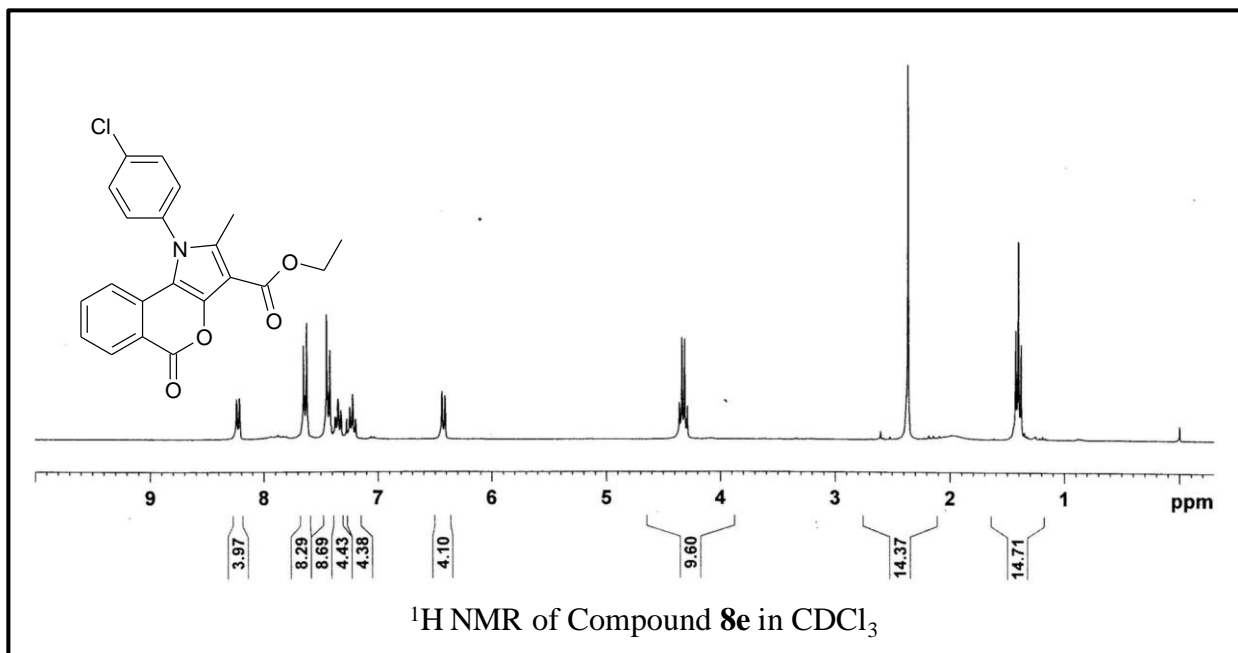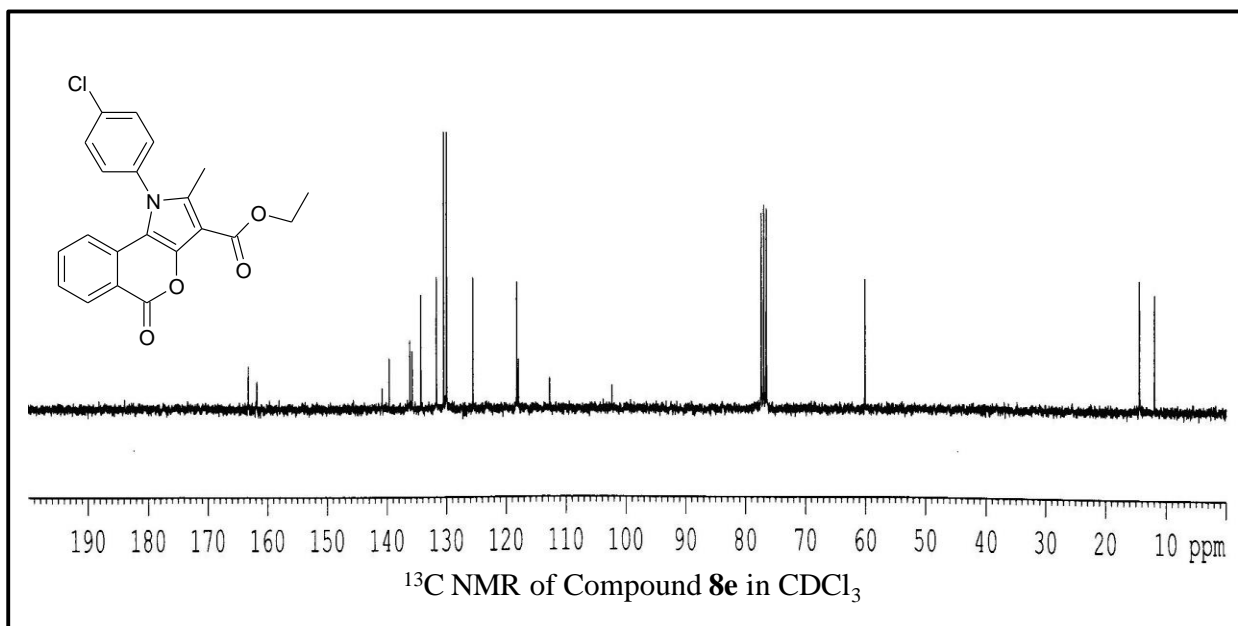

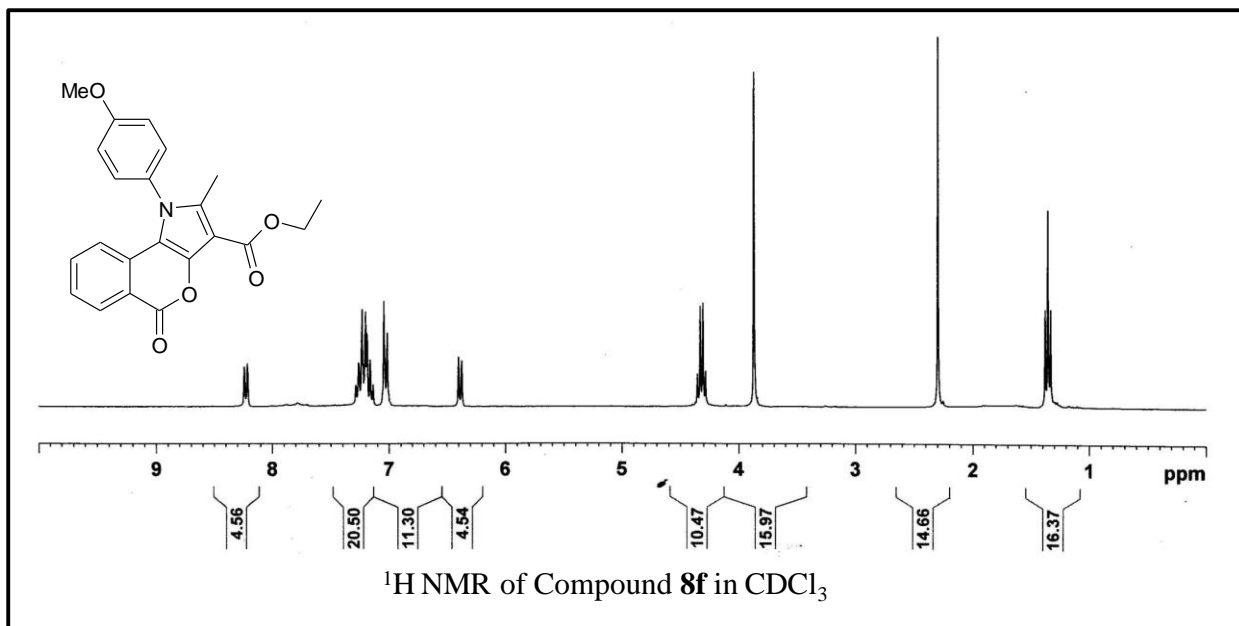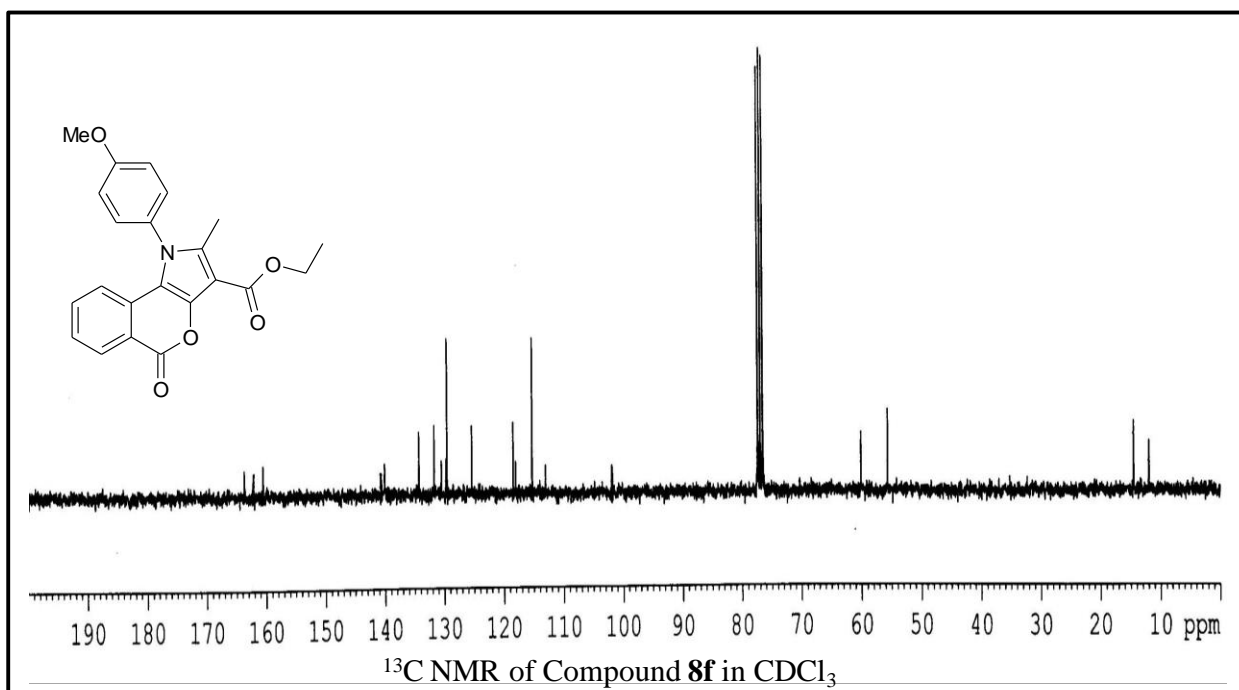



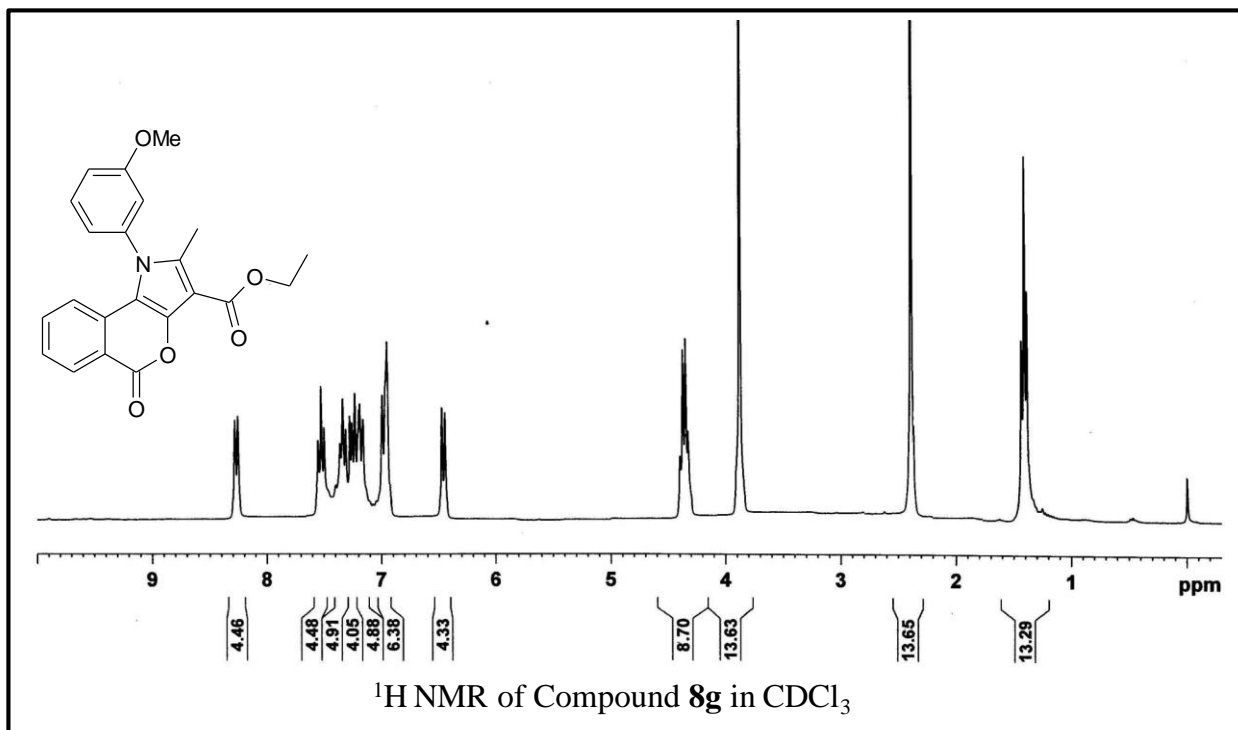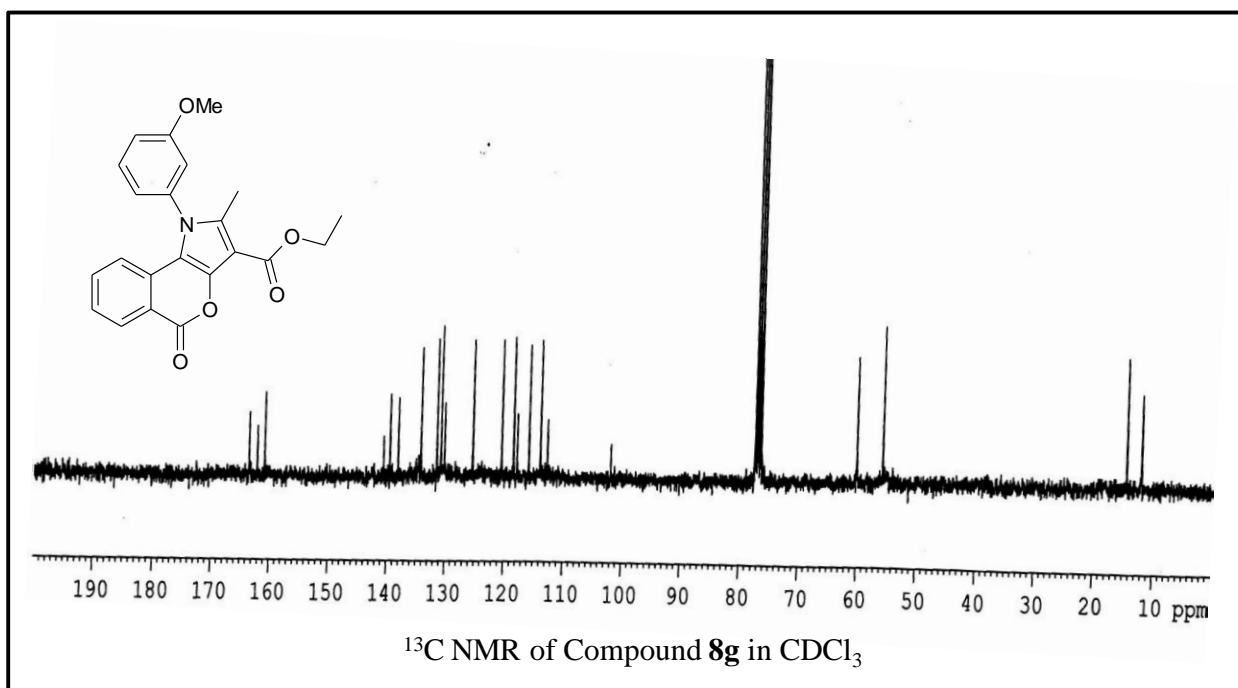

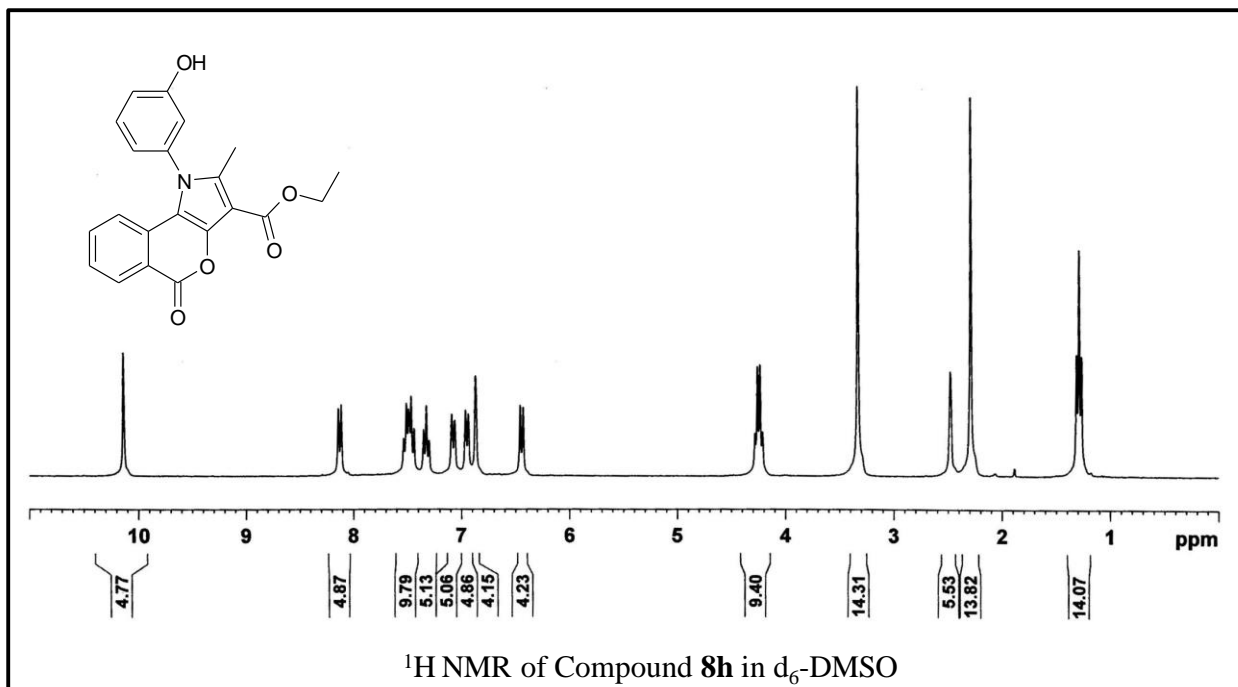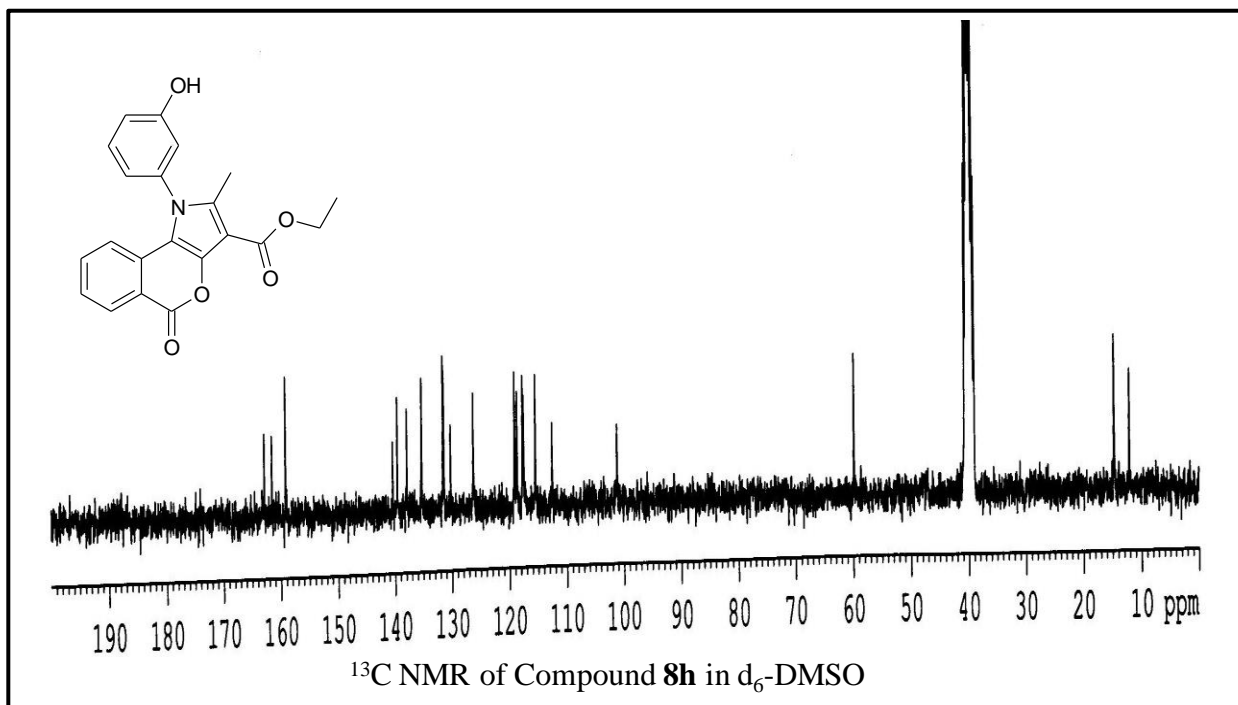

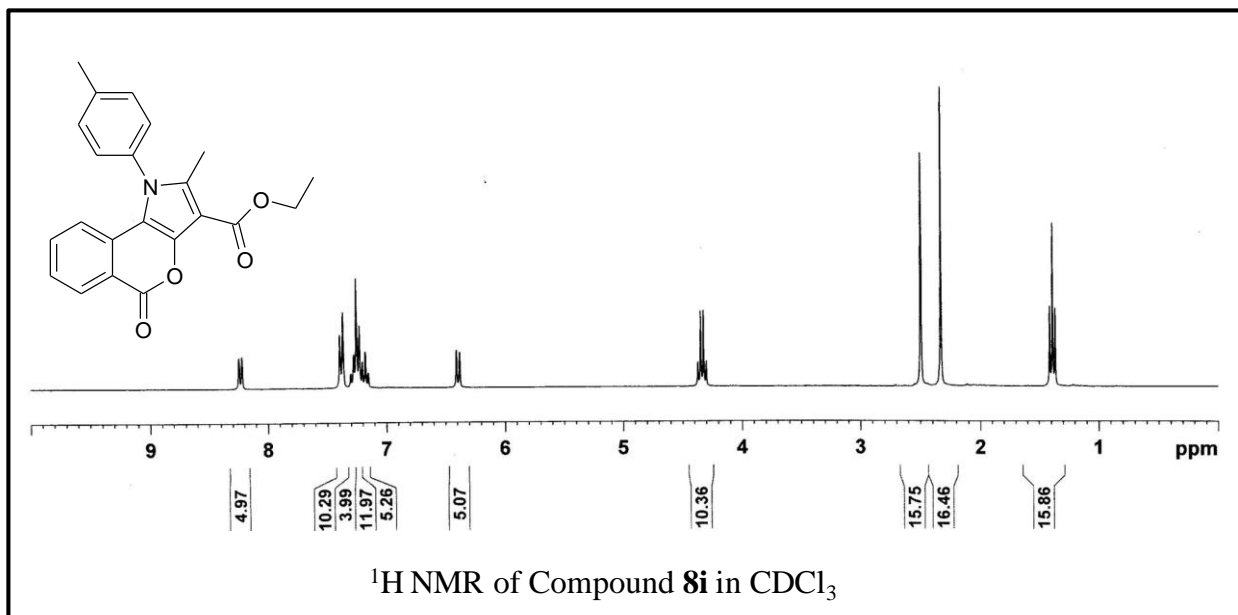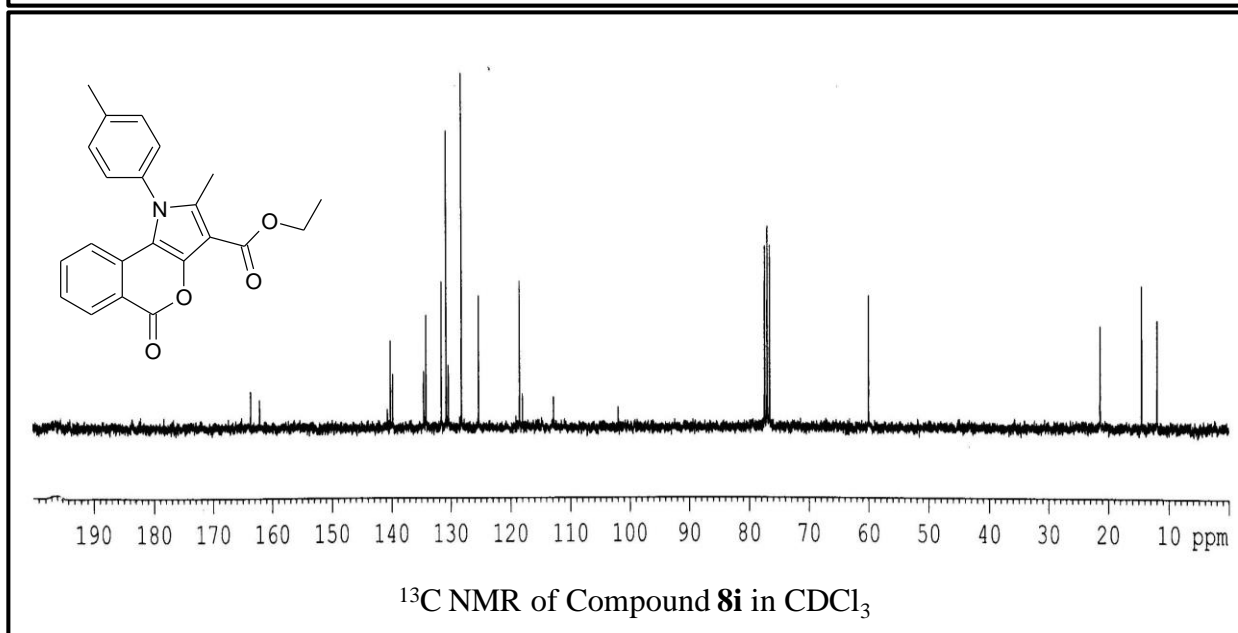

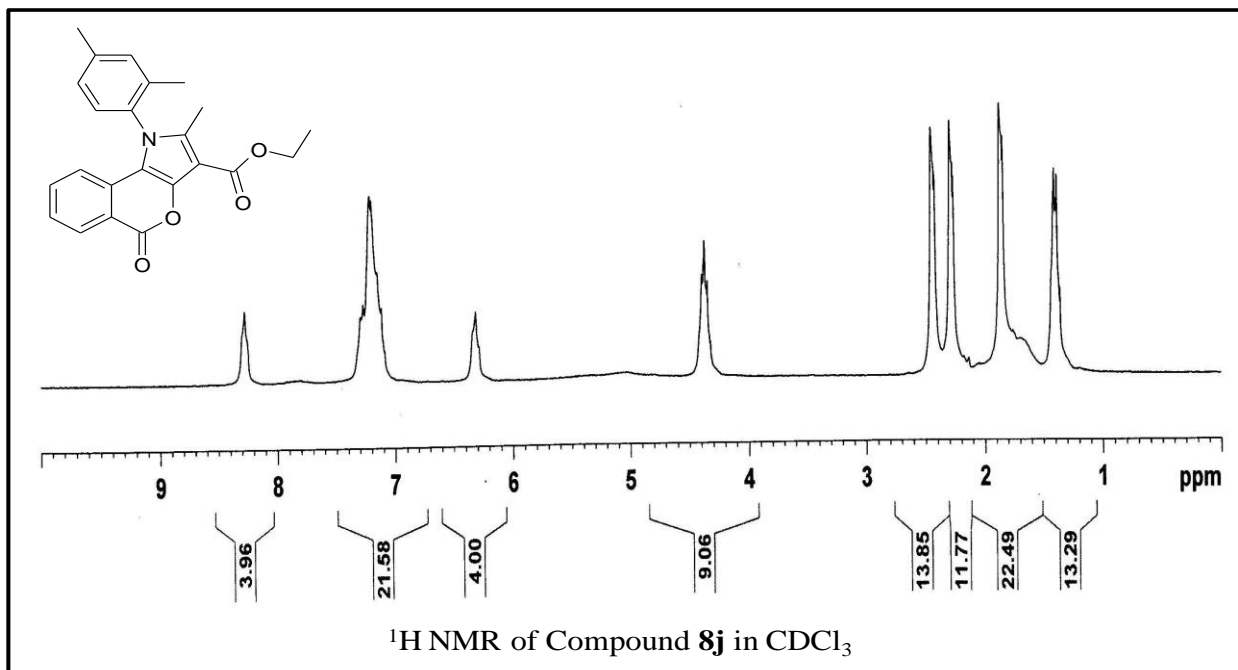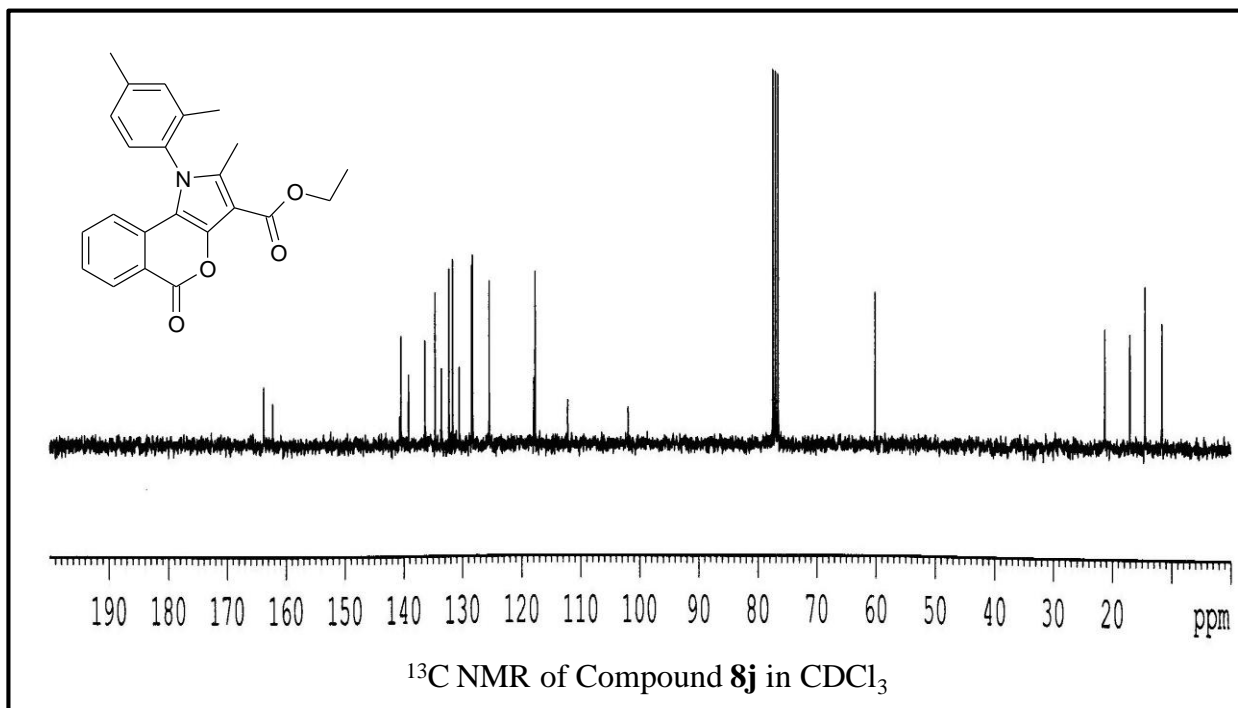

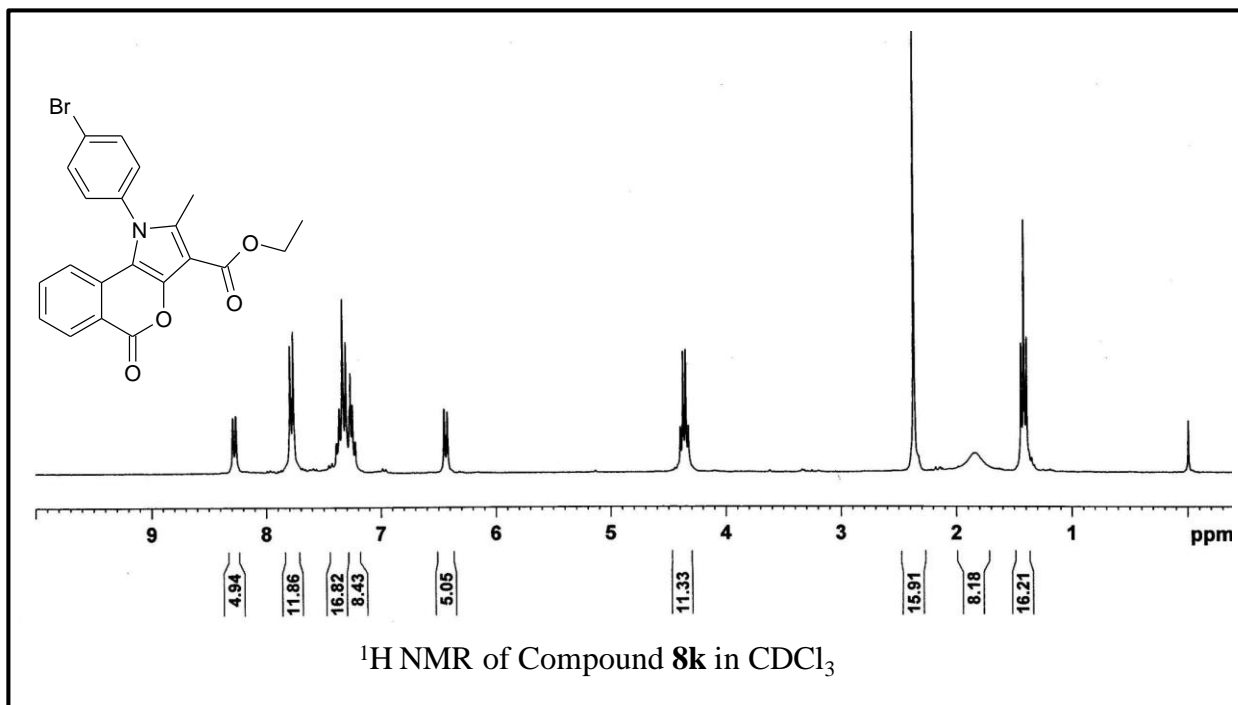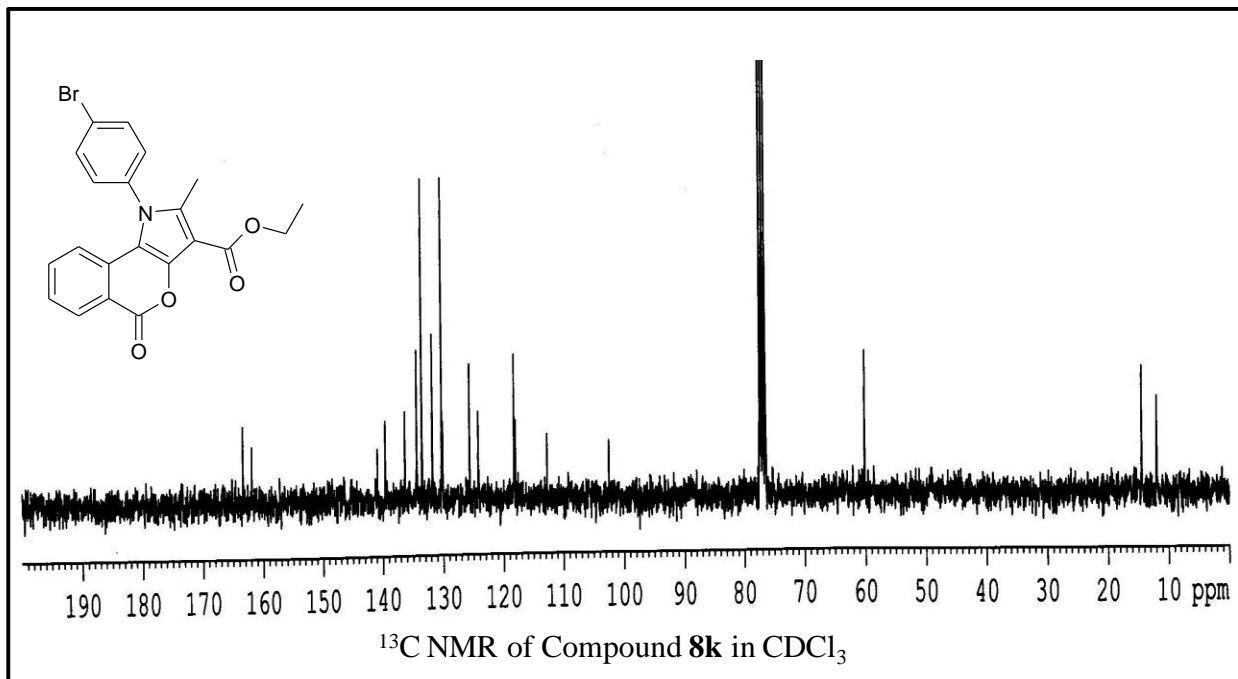

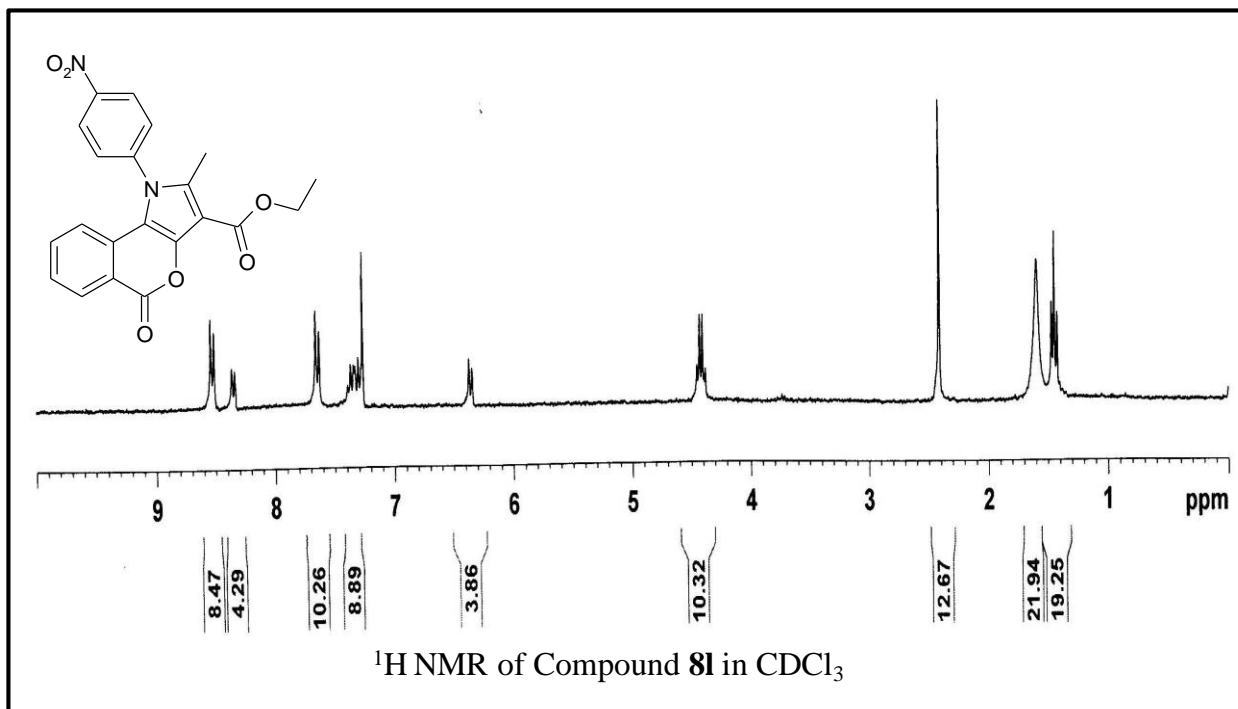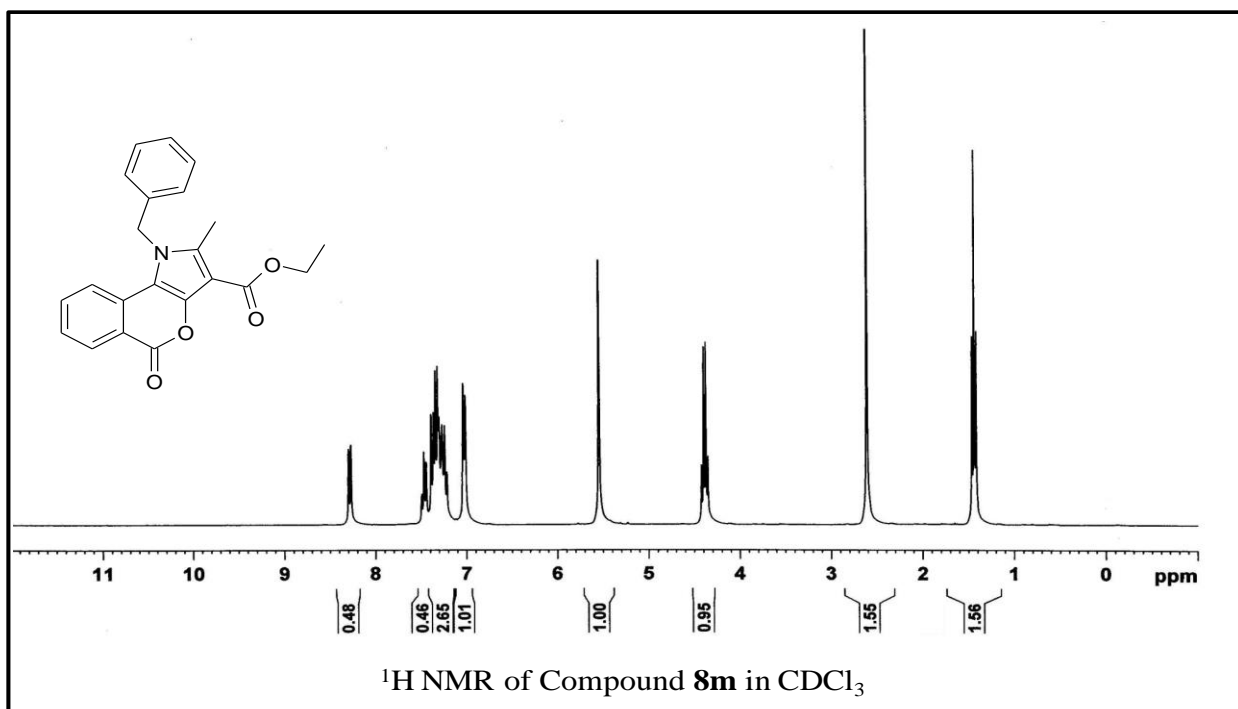

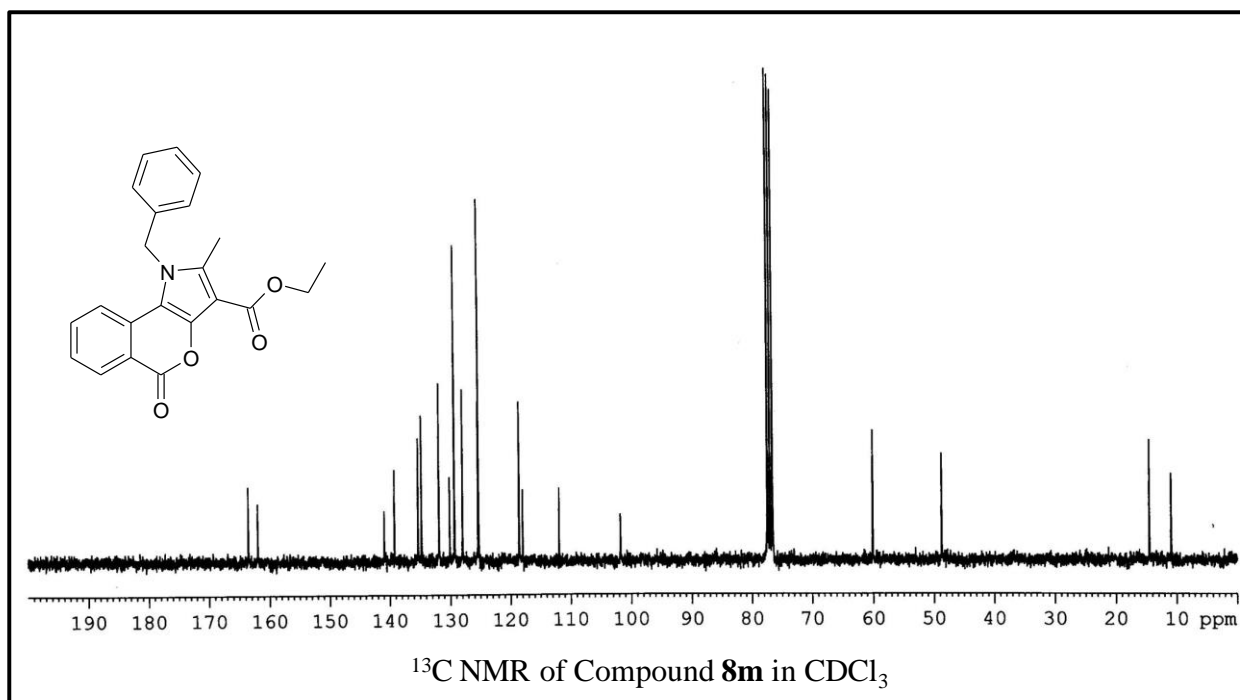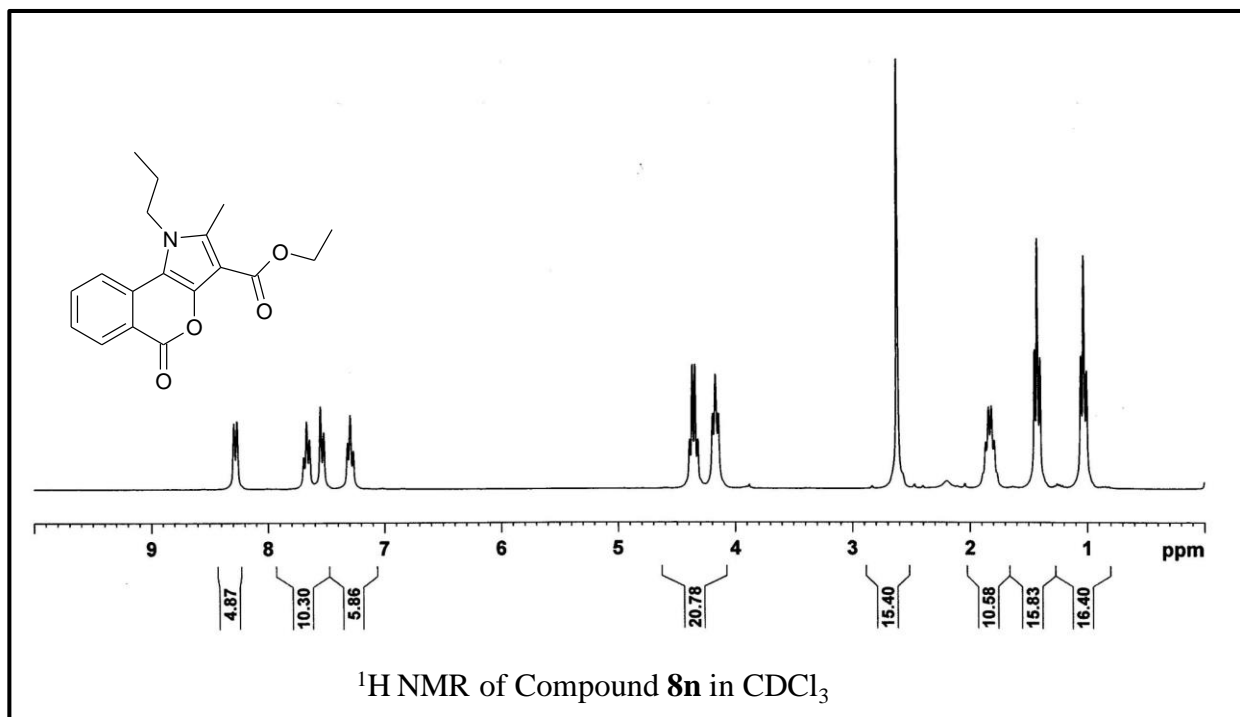

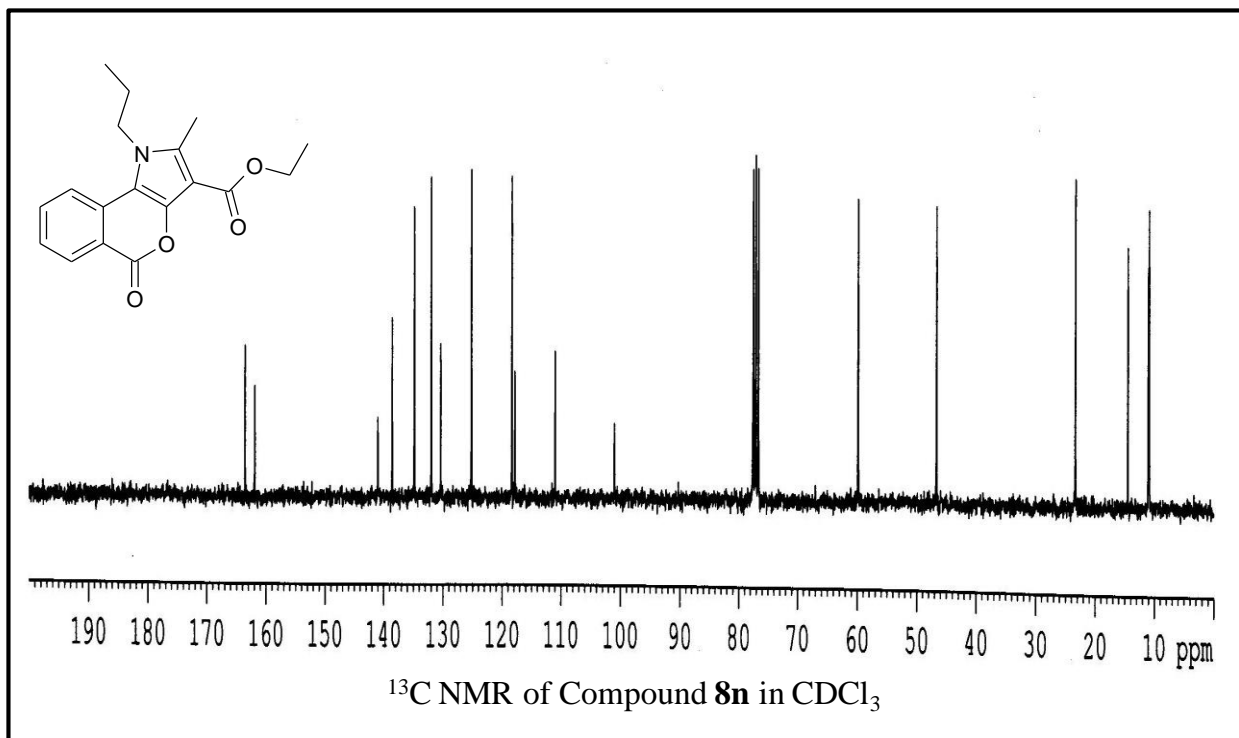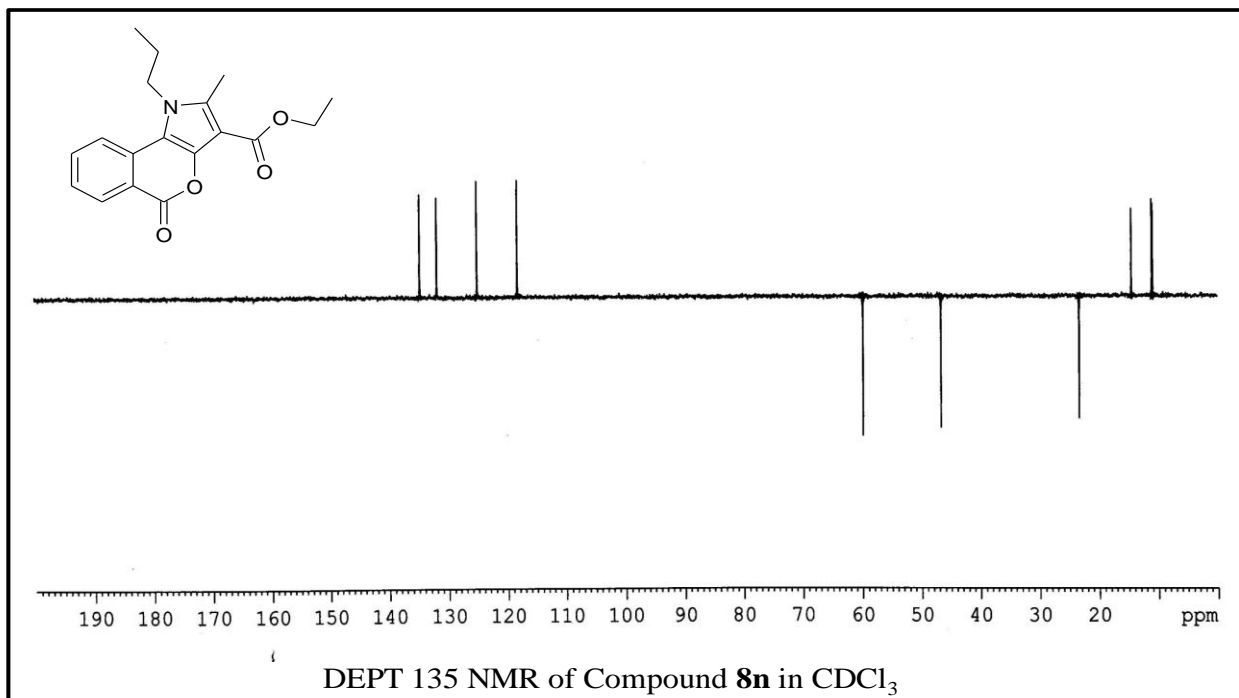



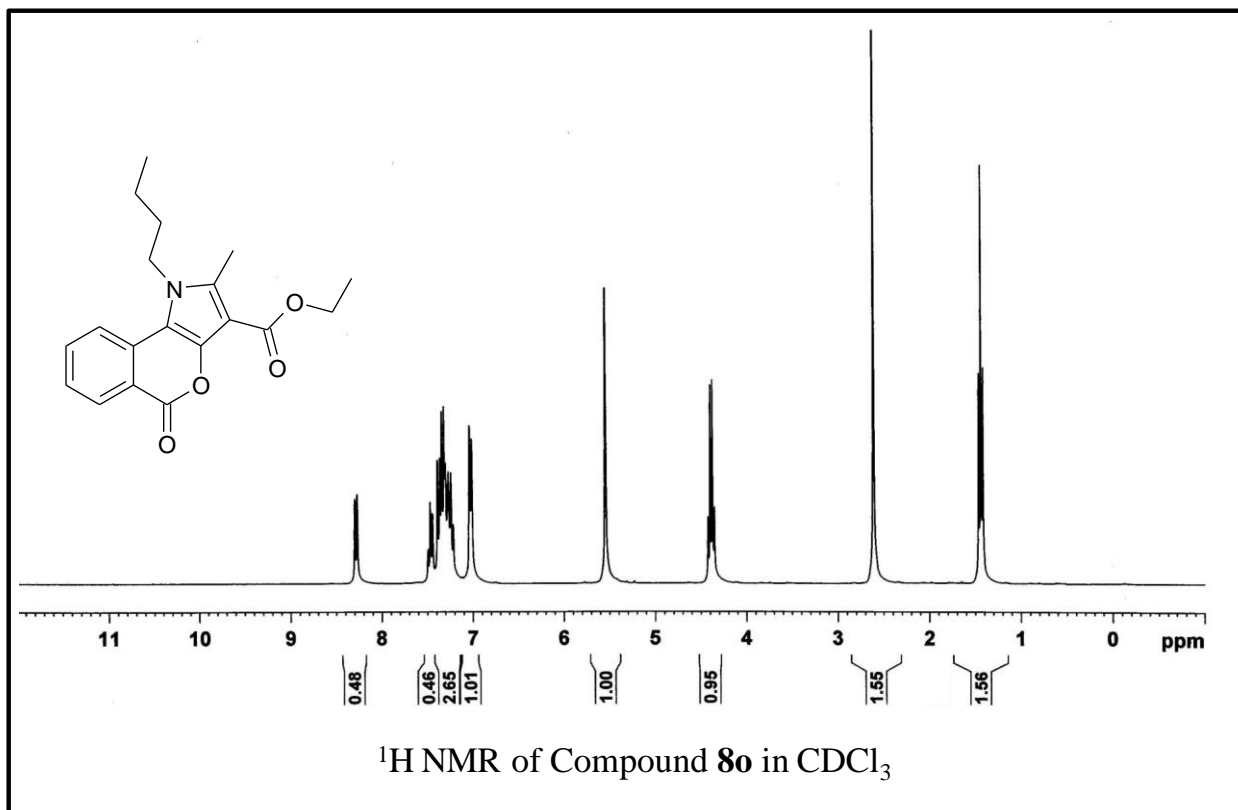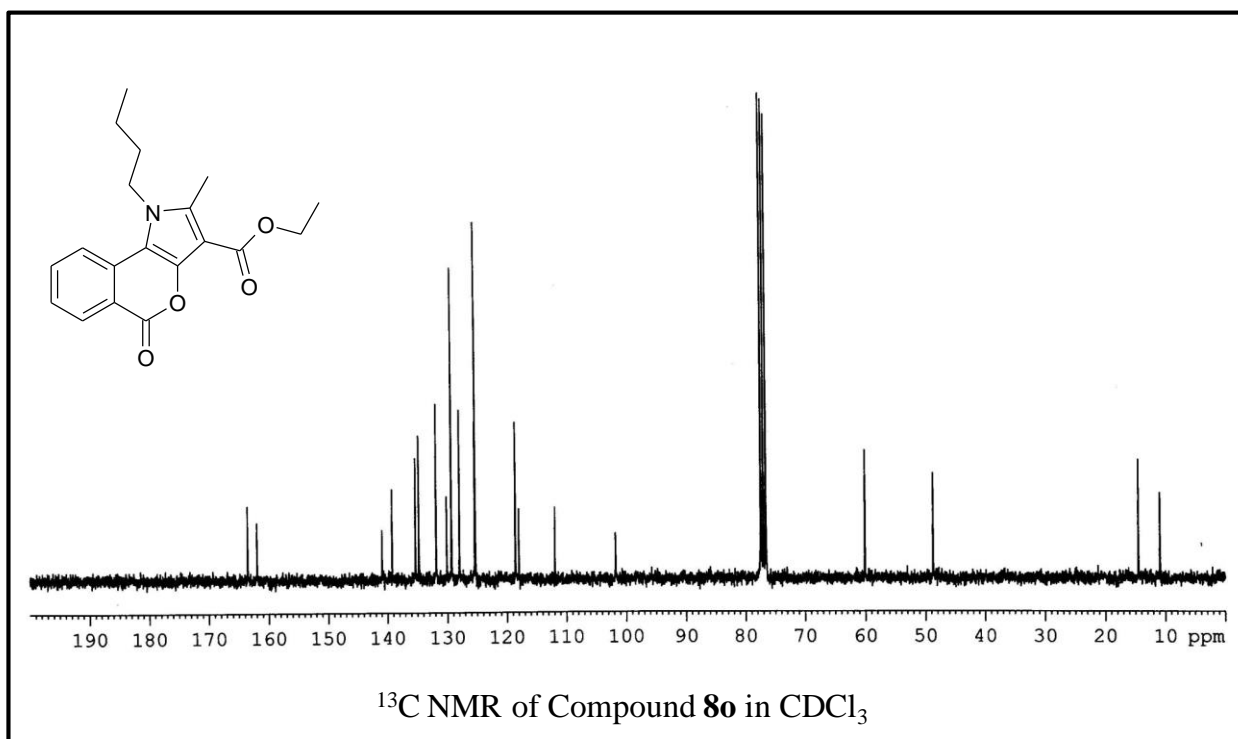

Supplement: Additional file 1 [file 1860-5397-9-269-S1.pdf]
